# Supplementary material for: Acid, silver, and solvent-free gold-catalyzed hydrophenoxylation of internal alkynes
Source: PubMed Central journal article supplement (PMC3817533; doi:10.3762/bjoc.9.235), 2013-10-02

**Supporting Information**  
**for**  
**Acid, silver, and solvent-free gold catalyzed**  
**hydrophenoxylation of unactivated internal alkynes.**

Marcia E. Richard, Daniel V. Fraccica, Kevin J. Garcia, Erica J. Miller, Rosa M. Ciccarelli, Erin C. Holahan, Victoria L. Resh, Aakash Shah, Peter M. Findeis and Robert A. Stockland Jr.\*

Address: Department of Chemistry, Bucknell University, Lewisburg PA, 17837, USA

E-mail: Robert A. Stockland Jr.\* - rstockla@bucknell.edu

\* Corresponding author

**Detailed synthetic procedures for the synthesis of the arylgold**  
**compounds and vinyl ethers as well as NMR spectra for all new**  
**compounds.**

|                                                           |     |
|-----------------------------------------------------------|-----|
| General considerations.....                               | S2  |
| Synthesis and characterization of arylgold compounds..... | S2  |
| Synthesis and characterization of vinyl ethers.....       | S6  |
| References.....                                           | S13 |
| NMR spectra of new compounds.....                         | S14 |

**General considerations:** Unless specified, all solvents were dried using a Grubbs-type solvent purification system. (JohnPhos)AuCl and (*t*-BuXPhos)AuCl, were prepared by displacement of dimethyl sulfide from Me<sub>2</sub>SAuCl by JohnPhos or *t*-BuXPhos [1,2]. The (NHC)AuCl (NHC = SIMes, IMes, SIPr, IPr) [3,4] precursors as well as arylgold compounds **1–3** [5] were prepared following literature procedures. The arylboronic acids, alkynes, phenols, and Cs<sub>2</sub>CO<sub>3</sub> (powder) were obtained from Aldrich and used as received. NMR spectra were collected on a Varian DirectDrive 600 MHz NMR spectrometer (<sup>1</sup>H: 599.77 MHz and <sup>13</sup>C: 150.81 MHz). <sup>1</sup>H and <sup>13</sup>C{<sup>1</sup>H} chemical shifts were determined by reference to residual non-deuterated solvent resonances. The alkene geometry was determined using <sup>1</sup>H–<sup>1</sup>H NOESY experiments. All coupling constants are listed in Hertz. Microwave catalyzed reactions carried out in sealed vessels using a CEM Discover equipped with an external IR (surface) temperature sensor. The PowerMax setting on the Discover was off. Conventionally heated reactions were carried out in an oil bath. HRMS data were obtained on a Thermo Scientific Exactive Plus LC/MS system (ESI).

**General method for the arylation reactions: general procedure A:** For a typical reaction, (NHC)AuCl, 2 equiv of the arylboronic acid, 2 equiv of Cs<sub>2</sub>CO<sub>3</sub>, and a magnetic stirring bar were added to a 10 mL reactor vial. After exchanging the air for nitrogen, isopropanol was added by syringe. The mixtures were triturated on a stirring plate for 3 minutes followed by irradiation in the Discover microwave reactor. The following settings were used for each experiment: Temperature = 50 °C, time = 20 min, initial power level = 25 W. The initial power setting listed for each reaction was maintained until the desired temperature was reached. The power was then reduced for the remainder

of the reaction to maintain the temperature. The reaction time listed is the total irradiation time (no ramping periods). Note: High initial high levels of microwave power (to rapidly heat the sample) resulted in significant decomposition (gold metal). After cooling to room temperature, the volatiles were removed, and the title compounds were purified by column chromatography (basic alumina). The arylgold compounds were dissolved in  $\text{CH}_2\text{Cl}_2$  and dried over molecular sieves. After filtration, they were dried under vacuum to afford white powders.

**Preparation of (IMes)Au(4-C<sub>6</sub>H<sub>4</sub>t-Bu) (4).** General procedure A was followed with (IMes)AuCl (0.20 g, 0.37 mmol), 4-*tert*-butylphenylboronic acid (0.135 g, 0.76 mmol), cesium carbonate (0.24 g, 0.74 mmol), and isopropanol (1.5 mL). Chromatography: basic alumina (37.5 g), gradient hexane/THF (90:10–50:50).  $R_f$  0.60 (hexane/THF 50:50), yield = 0.18 g of a white powder (76.1%). HRMS:  $[\text{M} + \text{Na}]^+$  calcd for  $\text{C}_{31}\text{H}_{37}\text{AuN}_2\text{Na}$ : 657.2520; found, 657.2509. Spectral data:  $^1\text{H}$  NMR ( $\text{CDCl}_3$ , 25 °C)  $\delta$  7.07 (s, 4H, Ar-H), 7.04 (s, 2H, =CH), 6.98 (br s, 4H, Ar-H), 2.34 (s, 6H, -Me), 2.16 (s, 12H, -Me), 1.19 (s, 9H, -Me).  $^{13}\text{C}\{^1\text{H}\}$  NMR ( $\text{CDCl}_3$ , 25 °C)  $\delta$  196.0 (s, carbene C), 165.4 (s, quat), 146.6 (s, quat), 139.9 (s, Ar-CH), 139.0 (s, quat), 135.4 (s, quat), 134.9 (s, quat), 129.2 (s, Ar-CH), 123.6 (s, Ar-CH), 121.7 (s, =CH), 34.0 (s, quat), 31.4 (s, -CMe<sub>3</sub>), 21.1 (s, -Me), 18.0 (s, -Me).

**Preparation of (SIMes)Au(4-C<sub>6</sub>H<sub>4</sub>t-Bu) (5).** General procedure A was followed with (SIMes)AuCl (0.20 g, 0.37 mmol), 4-*tert*-butylphenylboronic acid (0.135 g, 0.76 mmol), cesium carbonate (0.24 g, 0.74 mmol), and isopropanol (1.5 mL). Chromatography: basic

alumina (37.5 g), gradient hexane/THF (90:10–50:50).  $R_f$  0.62 (hexane/THF 50:50), yield = 0.15 g of a white powder (63.5%). HRMS:  $[M + Na]^+$  calcd for  $C_{31}H_{39}AuN_2Na$ : 659.2676; found, 659.2683. Spectral data:  $^1H$  ( $CDCl_3$ , 25 °C)  $\delta$  7.00 (AA'BB', 4H, Ar-H), 6.94 (s, 4H, Ar-H), 3.93 (s, 4H, -NCH<sub>2</sub>-), 2.37 (s, 12H, -Me), 2.30 (s, 6H, -Me), 1.18 (s, 9H, -Me).  $^{13}C\{^1H\}$  NMR ( $CDCl_3$ , 25 °C)  $\delta$  216.4 (s, carbene C), 165.7 (s, quat), 146.7 (s, quat), 139.9 (s, Ar-CH), 138.2 (s, quat), 135.8 (s, quat), 135.4 (s, quat), 129.4 (s, Ar-CH), 123.5 (s, Ar-CH), 50.8 (s, -NCH<sub>2</sub>-), 34.0 (s, quat), 31.4 (s, -Me), 21.1 (s, -Me), 18.1 (s, -Me).

**Preparation of (SIMes)Au(4-C<sub>6</sub>H<sub>4</sub>OMe) (6).** General procedure A was followed with (SIMes)AuCl (0.20 g, 0.37 mmol), 4-methoxyphenylboronic acid (0.115 g, 0.76 mmol), cesium carbonate (0.24 g, 0.74 mmol), and isopropanol (1.5 mL). Chromatography: basic alumina (37.5 g), gradient hexane/THF (90:10–50:50).  $R_f$  0.45 (hexane/THF 50:50), yield = 0.12 g of a white powder (53.0%). HRMS:  $[M + Na]^+$  calcd for  $C_{28}H_{33}AuN_2ONa$ : 633.2156; found, 633.2144. Spectral data:  $^1H$  NMR ( $CDCl_3$ , 25 °C)  $\delta$  6.95 (s, 4H, Ar-H), 6.95 (AA'BB', 2H, Ar-H), 6.63 (AA'BB', 2H, Ar-H), 3.93 (s, 3H, -NCH<sub>2</sub>-), 3.66 (s, 3H, -OMe), 2.37 (s, 12H, -Me), 2.31 (s, 6H, -Me).  $^{13}C\{^1H\}$  NMR ( $CDCl_3$ , 25 °C)  $\delta$  216.2 (s, carbene C), 160.3 (s, quat), 157.1 (s, quat), 140.7 (s, Ar-CH), 138.2 (s, quat), 135.8 (s, quat), 135.4 (s, quat), 129.4 (s, Ar-CH), 112.7 (s, Ar-CH), 55.0 (s, -OMe), 50.9 (s, -NCH<sub>2</sub>-), 21.1 (s, -Me), 18.2 (s, -Me).

**Preparation of (IPr)Au(4-C<sub>6</sub>H<sub>4</sub>*t*-Bu) (7).** General procedure A was followed with (IPr)AuCl (0.20 g, 0.32 mmol), 4-*tert*-butylphenylboronic acid (0.115 g, 0.65 mmol),

cesium carbonate (0.21 g, 0.64 mmol), and isopropanol (1.5 mL). Chromatography: basic alumina (37.5 g), gradient hexane/THF (90:10-50:50).  $R_f$  0.69 (hexane/THF 50:50), yield = 0.20 g of a white powder (86.4%). HRMS:  $[M + Na]^+$  calcd for  $C_{37}H_{49}AuN_2Na$ : 741.3459; found, 741.3418. Spectral data:  $^1H$  NMR ( $CDCl_3$ , 25 °C)  $\delta$  7.44 (t, 2H,  $J = 7.5$ , Ar-H), 7.25 (d, 4H,  $J = 7.2$ , Ar-H), 7.13 (s, 2H, =CH-), 7.05 (s, 4H, Ar-H), 2.67 (sept, 4H,  $J = 6.9$ , iPrCH), 1.41 (d, 12H,  $J = 7.2$ , iPr-Me), 1.23 (d, 12H,  $J = 7.2$ , iPr-Me), 1.18 (s, 9H, -Me).  $^{13}C\{^1H\}$  NMR ( $CDCl_3$ , 25 °C)  $\delta$  197.3 (s, carbene C), 166.1 (s, quat), 146.2 (s, quat), 145.7 (s, quat), 140.0 (s, Ar-CH), 134.7 (s, quat), 130.1 (s, Ar-CH), 123.9 (s, Ar-CH), 123.5 (s, Ar-CH), 122.7 (s, =CH-), 34.0 (s, -CMe<sub>3</sub>), 31.4 (s, -CMe<sub>3</sub>), 28.8 (s, iPr-CH), 24.5 (s, iPr-Me), 23.9 (s, iPr-Me).

**Preparation of (SIPr)Au(4-C<sub>6</sub>H<sub>4</sub>t-Bu) (8).** General procedure A was followed with (SIPr)AuCl (0.20 g, 0.32 mmol), 4-*tert*-butylphenylboronic acid (0.115 g, 0.65 mmol), cesium carbonate (0.21 g, 0.64 mmol), and isopropanol (1.5 mL). Chromatography: basic alumina (37.5 g), gradient hexane/THF (90:10-50:50).  $R_f$  0.70 (hexane/THF 50:50), yield = 0.21 g of a white powder (91%). HRMS:  $[M + Na]^+$  calcd for  $C_{37}H_{51}AuN_2Na$ : 743.3618; found, 743.3574. Spectral data:  $^1H$  NMR ( $CDCl_3$ , 25 °C)  $\delta$  7.34 (t, 2H,  $J = 7.5$ , Ar-H), 7.20 (d, 4H,  $J = 8.4$ , Ar-H), 7.02 (AA'BB', 2H, Ar-H), 6.96 (AA'BB', 2H, Ar-H), 3.98 (s, 4H, -NCH<sub>2</sub>-), 3.15 (sept, 4H,  $J = 6.8$ , iPr-CH), 1.48 (d, 12H,  $J = 7.2$ , iPr-Me), 1.34 (d, 12H,  $J = 7.2$ , iPr-Me), 1.16 (s, 9H, -CMe<sub>3</sub>).  $^{13}C\{^1H\}$  NMR ( $CDCl_3$ , 25 °C)  $\delta$  216.7 (s, carbene C), 166.4 (s, quat), 146.7 (s, quat), 146.1 (s, quat), 139.9 (s, Ar-CH), 134.8 (s, quat), 129.4 (s, Ar-CH), 124.3 (s, Ar-CH), 123.4 (s, Ar-CH), 53.7 (s, -NCH<sub>2</sub>-), 34.0 (s, -CMe<sub>3</sub>), 31.4 (s, -CMe<sub>3</sub>), 29.0 (s, iPr-CH), 25.1 (s, iPr-Me), 24.0 (s, iPr-Me).

**Preparation of (SIPr)Au(4-C<sub>6</sub>H<sub>4</sub>OMe) (9).** General procedure A was followed with (SIPr)AuCl (0.20 g, 0.32 mmol), 4-methoxyphenylboronic acid (0.10 g, 0.66 mmol), cesium carbonate (0.21 g, 0.64 mmol), and isopropanol (1.5 mL). Chromatography: basic alumina (37.5 g), gradient hexane/THF (90:10–50:50). *R<sub>f</sub>* 0.65 (hexane/THF 50:50), yield = 0.15 g of a white powder (67.3%). HRMS: [M + Na]<sup>+</sup> calcd for C<sub>34</sub>H<sub>45</sub>AuN<sub>2</sub>ONa: 717.3098; found, 717.3055. Spectral data: <sup>1</sup>H NMR (CDCl<sub>3</sub>, 25 °C) δ 7.36 (t, 2H, *J* = 7.8, Ar-H), 7.21 (d, 4H, *J* = 7.8, Ar-H), 6.92 (d, 2H, *J* = 8.4, Ar-H), 6.60 (d, 2H, *J* = 8.4, Ar-H), 4.00 (s, 4H, -NCH<sub>2</sub>-), 3.63 (s, 3H, -OMe), 3.15 (sept, 4H, *J* = 6.9, iPr-CH), 1.47 (d, 12H, *J* = 7.2, iPr-Me), 1.35 (d, 12H, *J* = 7.2, iPr-Me). <sup>13</sup>C{<sup>1</sup>H} NMR (CDCl<sub>3</sub>, 25 °C) δ 216.6 (s, carbene C), 160.9 (s, quat), 156.8 (s, quat), 146.7 (s, quat), 140.6 (s, Ar-CH), 134.8 (s, quat), 129.4 (s, Ar-CH), 124.3 (s, Ar-CH), 112.6 (s, Ar-CH), 54.9 (s, -NCH<sub>2</sub>-), 53.7 (s, -OMe), 29.0 (s, iPr-CH), 25.1 (s, iPr-Me), 24.1 (s, iPr-Me).

**General method for the catalyst screening reactions: microwave and conventional heating: general procedure B:** A reactor vial (10 mL) was charged with the LAuAr species (**1–9**, 0.014 mmol), alkyne (0.28 mmol), phenol (0.56 mmol), and a magnetic stirring bar. After exchanging the air for nitrogen, the samples were irradiated in a focused microwave reactor or heated in an oil bath. For the reactions carried out in the microwave reactor, the initial power setting listed for each reaction was maintained until the desired temperature was reached. No ramping periods were used in these reactions; thus, the reaction time listed is the total irradiation time (not the time at the desired temperature). After cooling, CDCl<sub>3</sub> was added to the reaction mixtures until

homogeneous solutions were obtained ( $\approx 2$  mL). Anisole (internal standard, 0.28 mmol) was added to the solutions and the extent of each reaction was determined by  $^1\text{H}$  NMR spectroscopy.

Isolation of the vinyl ethers: The synthesis of the vinyl ethers was carried out following the same general procedure from the catalyst screening reactions using either **1** or **7** as the catalyst. Once cooled, the vinyl ethers were purified by column chromatography, dried using molecular sieves (hexane/EtOAc solution), and isolated as oils or powders following removal of the volatiles.

**Preparation of 1-[[*(1Z)*-1,2-diphenylethenyl]oxy]-4-nitrobenzene (10), CAS:** 1219621-28-9 [6]. General procedure B was followed (microwave heating) using **1** (0.0088 g, 0.014 mmol), diphenylacetylene (0.050 g, 0.28 mmol), and 4-nitrophenol (0.078 g, 0.56 mmol). Temperature = 130 °C, time = 20 min, initial power level = 50 W. Chromatography: silica gel (19.1 g), hexane/ETOAc (90:10).  $R_f$  0.62 (hexane/EtOAc 90:10), yield = 0.074 g of a white powder (83%).

**Preparation of 1-[[*(1Z)*-1,2-diphenylethenyl]oxy]-4-trifluoromethylbenzene (11).** CAS: 1219621-27-8 [6]. General procedure B was followed (microwave heating) with **1** (0.0088 g, 0.014 mmol), diphenylacetylene (0.050 g, 0.28 mmol), and 4-(trifluoromethyl)phenol (0.091 g, 0.56 mmol). Temperature = 130 °C, time = 20 min, initial power level = 50 W. Chromatography: silica gel (19.1 g), hexane/EtOAc (95:5).  $R_f$  0.56 (hexane/EtOAc 95:5), yield = 0.086 g of a white powder (91%).

**Preparation of 1-[(1Z)-1,2-diphenylethenyl]oxy]-2-nitrobenzene (12)**, CAS: 1219621-36-9 [6]. General procedure B was followed (microwave heating) with **1** (0.0088 g, 0.014 mmol), diphenylacetylene (0.050 g, 0.28 mmol), and 2-nitrophenol (0.078 g, 0.56 mmol). Temperature = 130 °C, time = 20 min, initial power level = 50 W. Chromatography: silica gel (19.1 g), hexane/EtOAc (95:5).  $R_f$  0.40 (hexane/EtOAc 95:5), yield = 0.062 g of a pale yellow powder (70%).

**Preparation of 1-[(1Z)-1,2-diphenylethenyl]oxy]benzene (13)**, CAS: 1219621-30-3 [6]. General procedure B was followed (conventional heating) with **7** (0.010 g, 0.014 mmol) diphenylacetylene (0.050 g, 0.28 mmol), and phenol (0.053 g, 0.56 mmol). Temperature = 130 °C, time = 20 min. Chromatography: silica gel (19.1 g), hexane/EtOAc (93:7).  $R_f$  0.74, hexane/EtOAc (93:7), yield = 0.052 g of a white powder (68%).

**Preparation of 1-[(1Z)-1,2-diphenylethenyl]oxy]-4-*tert*-butylbenzene (14)**. General procedure B was followed (conventional heating) with **7** (0.010 g, 0.014 mmol), diphenylacetylene (0.050 g, 0.28 mmol), and 4-*tert*-butylphenol (0.084 g, 0.56 mmol). Temperature = 130 °C, time = 20 min. Chromatography: silica gel (19.1 g), gradient hexane/EtOAc (100:0–98:2).  $R_f$  0.41 (hexane/EtOAc 98:2), yield = 0.067 g of a white powder (73%). HRMS:  $[M + H]^+$  calcd for  $C_{24}H_{25}O$ : 329.1907; found, 329.1903. Spectral data:  $^1H$  NMR ( $CDCl_3$ , 25 °C)  $\delta$  7.64 (d, 2H,  $J = 7.8$ , Ar-H), 7.59 (d, 2H,  $J = 7.2$ , Ar-H), 7.31–7.17 (m, 8H, Ar-H), 6.93 (AA'BB', 2H, Ar-H), 6.62 (s, 1H, =CH-), 1.23 (s, 9H, - $CM_e_3$ ).  $^{13}C\{^1H\}$  NMR ( $CDCl_3$ , 25 °C)  $\delta$  154.0 (s, quat), 149.9 (s, quat), 144.5 (s, quat),



136.3 (s, quat), 134.9 (s, quat), 129.0 (s, Ar-CH), 128.52 (s, Ar-CH), 128.50 (s, Ar-CH), 128.3 (s, Ar-CH), 127.3(s, Ar-CH), 126.4 (s, Ar-CH), 126.1 (s, Ar-CH), 116.7 (s, =CH-), 115.6 (s, Ar-CH), 34.1 (s, -CMe<sub>3</sub>), 31.5 (s, -CMe<sub>3</sub>).

**Preparation of 1-[[*(1Z)*-1,2-diphenylethenyl]oxy]-4-methoxybenzene (15)**, CAS: 1219621-22-3 [6]. General procedure B was followed (microwave heating) with **1** (0.0088 g, 0.014 mmol), diphenylacetylene (0.050 g, 0.28 mmol), and 4-methoxyphenol (0.070 g, 0.56 mmol). Temperature = 130 °C, time = 20 min, initial power level = 50 W. Chromatography: silica gel (19.1 g), hexane/EtOAc (100:0–90:10). *R<sub>f</sub>* 0.51 (hexane/EtOAc 95:5), yield = 0.068 g of a white powder (80%).

**Preparation of 4-[[*(1Z)*-1-butyl-1-hexen-1-yl]oxy]nitrobenzene (16)**. General procedure B was followed (microwave heating) with **1** (0.0088 g, 0.014 mmol), 5-decyne (50.6 μL, 0.28 mmol), and 4-nitrophenol (0.078 g, 0.56 mmol). Temperature = 130 °C, time = 20 min, initial power level = 50 W. Chromatography: silica gel (19.1 g), gradient hexane/EtOAc (100:0–60:40). *R<sub>f</sub>* 0.67 (hexane/EtOAc 95:5), yield = 0.068 g of a colorless oil (87%). HRMS: [M + H]<sup>+</sup> calcd for C<sub>16</sub>H<sub>24</sub>NO<sub>3</sub>: 278.1758; found, 278.1748. Spectral data: <sup>1</sup>H NMR (CDCl<sub>3</sub>, 25 °C) δ 8.19 (AA'BB', 2H, Ar-H), 6.99 (AA'BB', 2H, Ar-H), 5.12 (t, 1H, *J* = 7.2, =CH-), 2.15 (t, 2H, *J* = 7.8, -CH<sub>2</sub>-), 1.93 (q, 2H, *J* = 7.2 -CH<sub>2</sub>-), 1.47 (m, 2H, -CH<sub>2</sub>-), 1.34–1.25 (m, 6H, -CH<sub>2</sub>-), 0.89 (t, 3H, *J* = 7.2, -Me), 0.84 (t, 3H, *J* = 6.8, -Me). <sup>13</sup>C{<sup>1</sup>H} NMR (CDCl<sub>3</sub>, 25 °C) δ 162.3 (s, quat), 150.0 (s, quat), 141.9 (s, quat), 126.0 (s, Ar-CH), 117.5 (s, =CH-), 115.5 (s, Ar-CH), 32.2 (s, -CH<sub>2</sub>-), 31.3 (s, -CH<sub>2</sub>-), 28.9 (s, -CH<sub>2</sub>-), 24.9 (s, -CH<sub>2</sub>-), 22.3 (s, -CH<sub>2</sub>-), 22.1 (s, -CH<sub>2</sub>-), 13.8 (s, -CH<sub>3</sub>).

**Preparation of [[(1Z)-1-butyl-1-hexen-1-yl]oxy]-4-(trifluoromethyl)benzene (17).**

General procedure B was followed (microwave heating) with **1** (0.0088 g, 0.014 mmol), 5-decyne (50.6  $\mu$ L, 0.28 mmol), and 4-(trifluoromethyl)phenol (0.091 g, 0.56 mmol). Temperature = 130  $^{\circ}$ C, time = 20 min, initial power level = 50 W. Chromatography: silica gel (19.1 g), hexane.  $R_f$  0.86 (hexane), yield = 0.080 g of a colorless oil (95%). HRMS:  $[M + H]^+$  calcd for  $C_{17}H_{24}F_3O$ : 301.1781; found, 301.1771. Spectral data:  $^1H$  NMR ( $CDCl_3$ , 25  $^{\circ}$ C)  $\delta$  7.53 (d, 2H,  $J = 7.8$ , Ar-H), 6.98 (d, 2H,  $J = 8.4$ , Ar-H), 5.07 (t, 1H,  $J = 7.2$ , =CH-), 2.12 (t, 2H,  $J = 7.5$ , -CH<sub>2</sub>-), 1.96 (q, 2H,  $J = 7.2$ , -CH<sub>2</sub>-), 1.44 (m, 2H, -CH<sub>2</sub>-), 1.35-1.25 (m, 6H, -CH<sub>2</sub>-), 0.88 (t, 3H,  $J = 7.2$ , -Me), 0.85 (t, 3H,  $J = 7.2$ , -Me).  $^{13}C\{^1H\}$  NMR ( $CDCl_3$ , 25  $^{\circ}$ C)  $\delta$  159.5 (s, quat), 150.1 (s, quat), 126.9 (q,  $J = 3.9$ , Ar-CH), 124.4 (q,  $J = 271.3$ , -CF<sub>3</sub>), 123.3 (q,  $J = 32.4$ , quat), 117.0 (s, =CH-), 115.6 (s, Ar-CH), 32.0 (s, -CH<sub>2</sub>-), 31.5 (s, -CH<sub>2</sub>-), 29.0 (s, -CH<sub>2</sub>-), 24.9 (s, -CH<sub>2</sub>-), 22.3 (s, -CH<sub>2</sub>-), 22.1 (s, -CH<sub>2</sub>-), 13.8 (s, -Me).

**Preparation of 2-[[[(1Z)-1-butyl-1-hexen-1-yl]oxy]nitrobenzene (18).**

General procedure B was followed (conventional heating) with **7** (0.010 g, 0.014 mmol), 5-decyne (50.6  $\mu$ L, 0.28 mmol), and 2-nitrophenol (0.078 g, 0.56 mmol). Temperature = 130  $^{\circ}$ C, time = 30 min. Chromatography: basic alumina (27.5 g), gradient hexane/THF (100:0–95:5).  $R_f$  0.80 (hexane/THF 95:5), yield = 0.066 g of a pale yellow oil (84%). HRMS:  $[M + H]^+$  calcd for  $C_{16}H_{24}NO_3$ : 278.1758 ; found, 278.1747. Spectral data:  $^1H$  NMR ( $CDCl_3$ , 25  $^{\circ}$ C)  $\delta$  7.87 (d, 1H,  $J = 7.0$ , Ar-H), 7.46 (t, 1H,  $J = 8.1$ , Ar-H), 7.04 (d, 1H,  $J = 7.2$ , Ar-H), 7.03 (t, 1H,  $J = 7.8$ , Ar-H), 5.12 (t, 1H,  $J = 6.9$ , =CH-), 2.15 (t, 2H,  $J = 7.8$ ,

-CH<sub>2</sub>-), 1.98 (q, 2H, *J* = 7.2, -CH<sub>2</sub>-), 1.47 (m, 2H, -CH<sub>2</sub>-), 1.37 - 1.26 (m, 6H, -CH<sub>2</sub>-), 0.88 (t, 3H, *J* = 7.2, -Me), 0.85 (t, 3H, *J* = 6.9, -Me). <sup>13</sup>C{<sup>1</sup>H} NMR (CDCl<sub>3</sub>, 25 °C) δ 150.3 (s, quat), 149.8 (s, quat), 139.7 (s, quat), 133.8 (s, Ar-CH), 125.7 (s, Ar-CH), 120.8 (s, Ar-CH), 117.5 (s, =CH-), 116.3 (s, Ar-CH), 32.0 (s, -CH<sub>2</sub>-), 31.3 (s, -CH<sub>2</sub>-), 28.8 (s, -CH<sub>2</sub>-), 24.8 (s, -CH<sub>2</sub>-), 22.2 (s, -CH<sub>2</sub>-), 22.1 (s, -CH<sub>2</sub>-), 13.81 (s, -Me), 13.79 (s, -Me).

**Preparation of [[(1Z)-1-butyl-1-hexen-1-yl]oxy]benzene (19).** General procedure B was followed (conventional heating) with **7** (0.010 g, 0.014 mmol), 5-decyne (50.6 μL, 0.28 mmol), and phenol (0.053 g, 0.56 mmol). Temperature = 130 °C, time = 20 min. Chromatography: silica gel (19.1 g), hexane. *R<sub>f</sub>* 0.71 (hexane), yield = 0.048 g of a colorless oil (74%). HRMS: [M + H]<sup>+</sup> calcd for C<sub>16</sub>H<sub>25</sub>O: 233.1907; found, 233.1898. Spectral data: <sup>1</sup>H NMR (CDCl<sub>3</sub>, 25 °C) δ 7.26 (t, 2H, *J* = 8.4, Ar-H), 6.95 (t, 1H, *J* = 7.5, Ar-H), 6.92 (d, 2H, *J* = 7.5, Ar-H), 5.00 (t, 1H, *J* = 7.2, =CH-), 2.11 (t, 2H, *J* = 7.2, -CH<sub>2</sub>-), 2.01 (q, 2H, *J* = 7.2, -CH<sub>2</sub>-), 1.43 (m, 2H, -CH<sub>2</sub>-), 1.29 (m, 6H, -CH<sub>2</sub>-), 0.87 (t, 3H, *J* = 7.2, -CH<sub>3</sub>), 0.85 (t, 3H, *J* = 7.2, -CH<sub>3</sub>). <sup>13</sup>C{<sup>1</sup>H} NMR (CDCl<sub>3</sub>, 25 °C) δ 156.8 (s, quat), 150.6 (s, quat), 129.4 (s, Ar-CH), 121.2 (s, Ar-CH), 116.1 (s, =CH-), 115.9 (s, Ar-CH), 32.0 (s, -CH<sub>2</sub>-), 31.7 (s, -CH<sub>2</sub>-), 29.1 (s, -CH<sub>2</sub>-), 24.8 (s, -CH<sub>2</sub>-), 22.3 (s, -CH<sub>2</sub>-), 22.2 (s, -CH<sub>2</sub>-), 13.90 (s, -Me), 13.87 (s, -Me).

**Preparation of [[(1Z)-1-butyl-1-hexen-1-yl]oxy]-4-*tert*-butylbenzene (20).** General procedure B was followed (microwave heating) with **1** (0.0088 g, 0.014 mmol), 5-decyne (50.6 μL, 0.28 mmol), and 4-*tert*-butylphenol (0.084 g, 0.56 mmol). Temperature = 130 °C, time = 20 min, initial power level = 50 W. Chromatography: silica gel (19.1 g),

hexane.  $R_f$  0.53 (hexane), yield = 0.057 g of a colorless oil (71%). HRMS:  $[M + H]^+$  calcd for  $C_{20}H_{33}O$ : 289.2533; found, 289.2524. Spectral data:  $^1H$  NMR ( $CDCl_3$ , 25 °C)  $\delta$  7.27 (AA'BB', 2H, Ar-H), 6.84 (AA'BB', 2H, Ar-H), 4.98 (t, 1H,  $J = 7.2$ , =CH-), 2.10 (t, 2H,  $J = 7.5$ , -CH<sub>2</sub>-), 2.02 (q, 2H,  $J = 7.0$ , -CH<sub>2</sub>-), 1.43 (m, 2H, -CH<sub>2</sub>-), 1.34-1.26 (m, 6H, -CH<sub>2</sub>-), 1.30 (s, 9H, -CMe<sub>3</sub>), 0.87 (t, 3H,  $J = 7.5$ , -CH<sub>3</sub>), 0.85 (t, 3H,  $J = 6.9$ , -CH<sub>3</sub>).  $^{13}C\{^1H\}$  NMR ( $CDCl_3$ , 25 °C)  $\delta$  154.4 (s, quat), 150.8 (s, quat), 143.9 (s, quat), 126.2 (s, Ar-CH), 115.9 (s, =CH-), 115.4 (s, Ar-CH), 34.1 (s, -CMe<sub>3</sub>), 32.0 (s, -CH<sub>2</sub>-), 31.8 (s, -CH<sub>2</sub>-), 31.6 (s, -CMe<sub>3</sub>), 29.1 (s, -CH<sub>2</sub>-), 24.9 (s, -CH<sub>2</sub>-), 22.4 (s, -CH<sub>2</sub>-), 22.2 (s, -CH<sub>2</sub>-), 14.0 (s, -Me), 13.9 (s, -Me).

**Preparation of [(1Z)-1-butyl-1-hexen-1-yl]oxy-4-methoxybenzene (21).** General procedure B was followed (microwave heating) with **1** (0.0088 g, 0.014 mmol), 5-decyne (50.6  $\mu$ L, 0.28 mmol), and 4-methoxyphenol (0.070 g, 0.56 mmol). Temperature = 130 °C, time = 20 min, initial power level = 50 W. Chromatography: silica gel (19.1 g), hexane/EtOAc (95:5).  $R_f$  0.86 hexane/EtOAc (95:5), yield = 0.066 g of a colorless oil (89%). HRMS:  $[M + H]^+$  calcd for  $C_{17}H_{27}O_2$ : 262.2013; found, 263.2011. Spectral data:  $^1H$  NMR ( $CDCl_3$ , 25 °C)  $\delta$  6.85 (AA'BB', 2H, Ar-H), 6.81 (AA'BB', 2H, Ar-H), 4.94 (t, 1H,  $J = 6.9$ , =CH-), 3.78 (s, 3H, -OMe), 2.07 (t, 2H,  $J = 7.5$ , -CH<sub>2</sub>-), 2.04 (q, 2H,  $J = 7.0$ , -CH<sub>2</sub>-), 1.41 (m, 2H, -CH<sub>2</sub>-), 1.30 (m, 6H, -CH<sub>2</sub>-), 0.86 (t, 6H,  $J = 7.2$ , -Me).  $^{13}C\{^1H\}$  NMR ( $CDCl_3$ , 25 °C)  $\delta$  154.3 (s, quat), 151.1 (s, quat), 150.6 (s, quat), 117.0 (s, Ar-CH), 115.4 (s, =CH-), 114.6 (s, Ar-CH), 55.7 (s, -OMe), 31.8 (s, -CH<sub>2</sub>-), 29.1 (s, -CH<sub>2</sub>-), 24.8 (s, -CH<sub>2</sub>-), 22.4 (s, -CH<sub>2</sub>-), 22.1 (s, -CH<sub>2</sub>-), 13.92 (s, -Me), 13.87 (s, -Me).

**Preparation of [(1Z)-4-[1-butyl-1-hexen-1-yl]oxy]-1,1'-biphenyl (22).** General procedure B was followed (conventional heating) with **7** (0.010 g, 0.014 mmol), 5-decyne (50.6  $\mu$ L, 0.28 mmol), and 4-phenylphenol (0.096 g, 56 mmol). Temperature = 130  $^{\circ}$ C, time = 20 min. Chromatography: silica gel (19.1 g), gradient hexane/EtOAc (100:0–95:5).  $R_f$  0.81 (hexane/EtOAc 95:5), yield = 0.069 g of a colorless oil (80%). HRMS:  $[M + H]^+$  calcd for  $C_{22}H_{29}O$ : 309.2220; found, 309.2211. Spectral data:  $^1H$  NMR ( $CDCl_3$ , 25  $^{\circ}$ C)  $\delta$  7.54 (d, 2H,  $J = 7.2$ , Ar-H), 7.50 (AA'BB', 2H, Ar-H), 7.40 (t, 2H,  $J = 7.5$ , Ar-H), 7.29 (t, 1H,  $J = 7.5$ , Ar-H), 6.98 (AA'BB', 2H, Ar-H), 5.03 (t, 1H,  $J = 6.9$ , =CH), 2.15 (t, 2H,  $J = 7.2$ , -CH<sub>2</sub>-), 2.04 (q, 2H,  $J = 7.2$ , -CH<sub>2</sub>-), 1.46 (m, 2H, -CH<sub>2</sub>-), 1.36–1.26 (m, 6H, -CH<sub>2</sub>-), 0.88 (t, 3H,  $J = 6.9$ , -Me), 0.87 (t, 3H,  $J = 7.2$ , -Me).  $^{13}C\{^1H\}$  NMR ( $CDCl_3$ , 25  $^{\circ}$ C)  $\delta$  156.4 (s, quat), 150.6 (s, quat), 140.8 (s, quat), 134.4 (s, quat), 128.7 (s, Ar-CH), 128.2 (s, Ar-CH), 126.8 (s, Ar-CH), 126.7 (s, Ar-CH), 116.3 (s, =CH-), 116.2 (s, Ar-CH), 32.1 (s, -CH<sub>2</sub>-), 31.7 (s, -CH<sub>2</sub>-), 29.1 (s, -CH<sub>2</sub>-), 24.9 (s, -CH<sub>2</sub>-), 22.4 (s, -CH<sub>2</sub>-), 22.2 (s, -CH<sub>2</sub>-), 13.94 (s, -CH<sub>3</sub>), 13.91 (s, -CH<sub>3</sub>).

## References

1. Nieto-Oberhuber, C.; Lopez, S.; Echavarren, A. M. *J. Am. Chem. Soc.* **2005**, *127*, 6178-6179. doi:10.1021/ja042257t
2. Hashmi, A. S. K.; Ata, F.; Haufe, P.; Rominger, F. *Tetrahedron* **2009**, *65*, 1919-1927. doi:10.1016/j.tet.2008.12.058
3. Landers, B.; Navarro, O. *Eur. J. Inorg. Chem.* **2012**, 2980-2982. doi:10.1002/ejic.201200248
4. de Fremont, P.; Scott, N. M.; Stevens, E. D.; Nolan, S. P. *Organometallics* **2005**, *24*, 2411-2418. doi:10.1021/om050111c
5. Lenker, H. K.; Gray, T. G.; Stockland Jr., R. A. *Dalton Trans.* **2012**, *41*, 13274-13276. doi:10.1039/C2DT32129G
6. Kuram, M. R.; Bhanuchandra, M.; Sahoo, A. K. *J. Org. Chem.* **2010**, *75*, 2247-2258. doi:10.1021/jo1000143

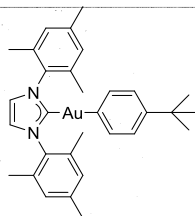

Std proton

File: home/ras/Desktop/600ras040313.001.fid

Pulse Sequence: s2pu1  
Solvent: cdcl3  
Temp: 25.0 C / 298.1 K  
Operator: ras  
File: 600ras040313.001  
VNMR5-600 "nmr600"

Relax. delay 1.000 sec  
Pulse 45.0 degrees  
Acq. time 2.049 sec  
Width 9615.4 Hz  
Single scan  
OBSERVE H1, 599.7738372 MHz  
DATA PROCESSING  
Resol. enhancement -0.0 Hz  
FT size 65536  
Total time 0 min, 9 sec

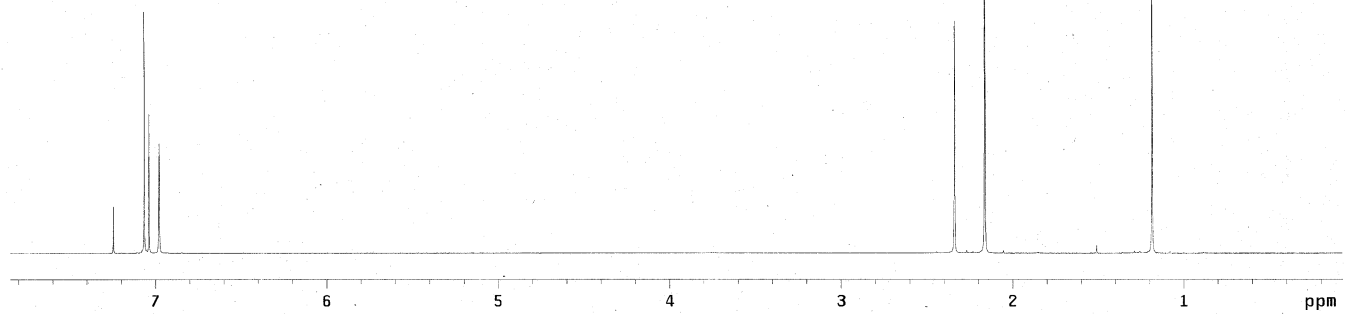

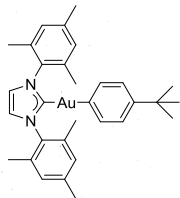

Std carbon

File: home/ras/Desktop/600ras040313.002.fid

Pulse Sequence: s2pul

Solvent: cdcl3  
Temp: 25.0 C / 298.1 K  
Operator: ras  
File: 600ras040313.002  
VNMR5-600 "nmr600"

Relax. delay 1.000 sec  
Pulse 45.0 degrees  
Acq. time 1.300 sec  
Width 36764.7 Hz  
22480 repetitions  
OBSERVE C13, 150.8132484 MHz  
DECOUPLE H1, 599.7768382 MHz  
Power 46 dB  
continuously on  
WALTZ-16 modulated  
DATA PROCESSING  
Line broadening 0.5 Hz  
Ft size 131072  
Total time 19 hr, 14 min, 43 sec

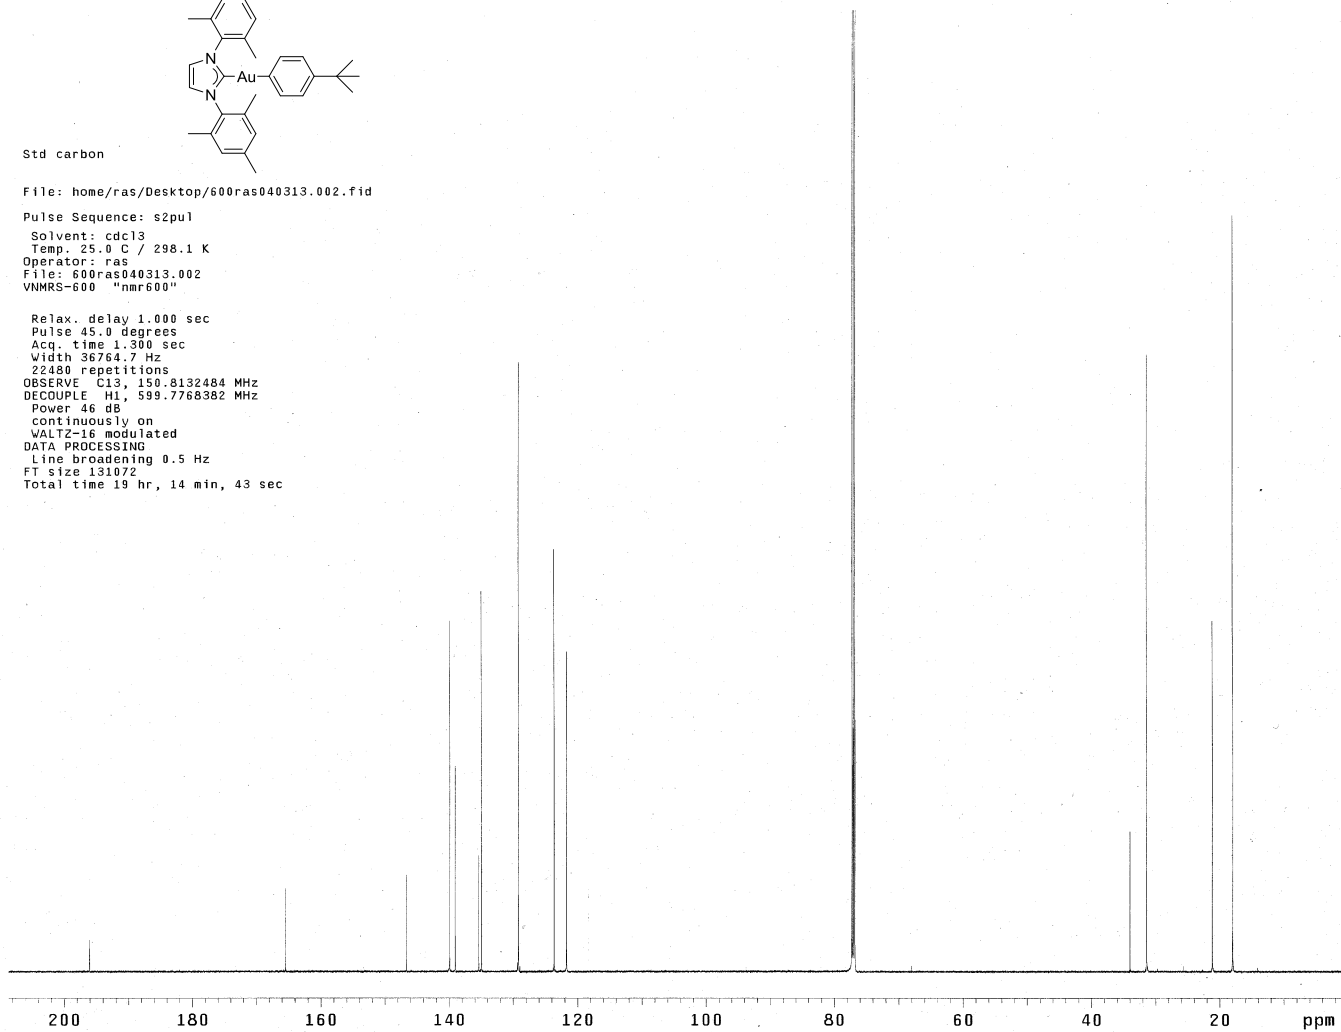

Std proton

Sample Name:

Archive directory:

Sample directory:

FidFile: 600ras032213.006

Pulse Sequence: Proton (s2pul)

Solvent: cdcl3

Data collected on: Mar 27 2013

Temp. 25.0 C / 298.1 K

Operator: ras

VNMRS-600 "nmr600"

Relax. delay 1.000 sec

Pulse 45.0 degrees

Acq. time 2.049 sec

Width 9615.4 Hz

Single scan

OBSERVE H1, 599.7738393 MHz

DATA PROCESSING

Resol. enhancement -0.0 Hz

FT size 65536

Total time 0 min 9 sec

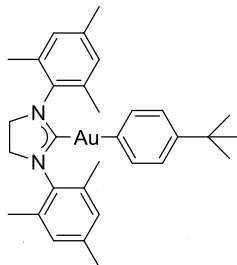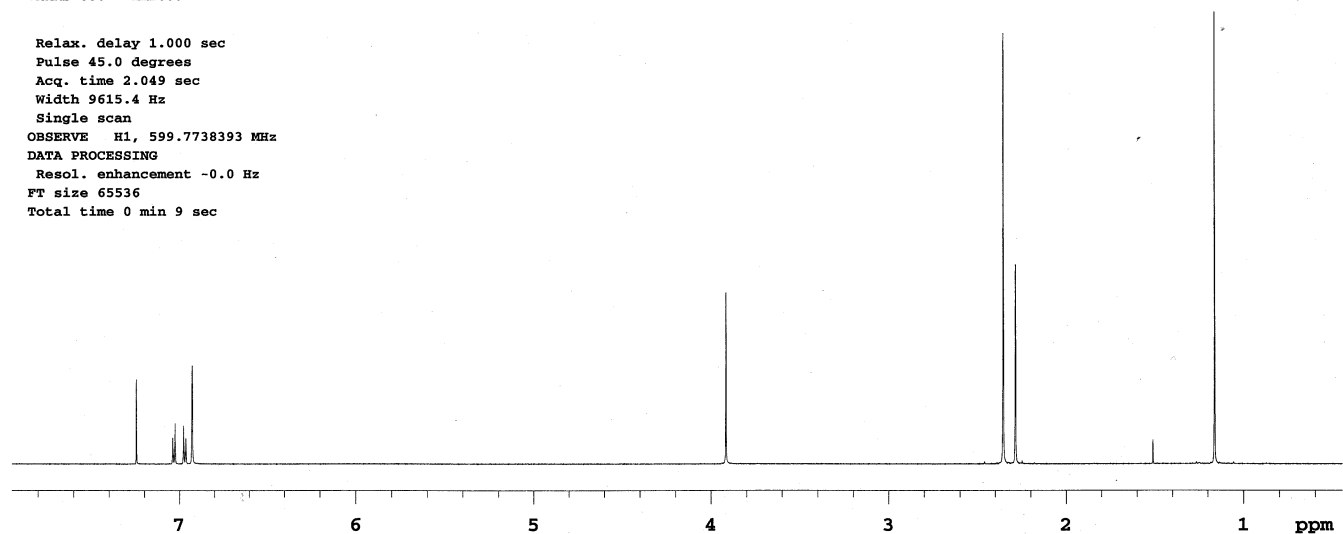



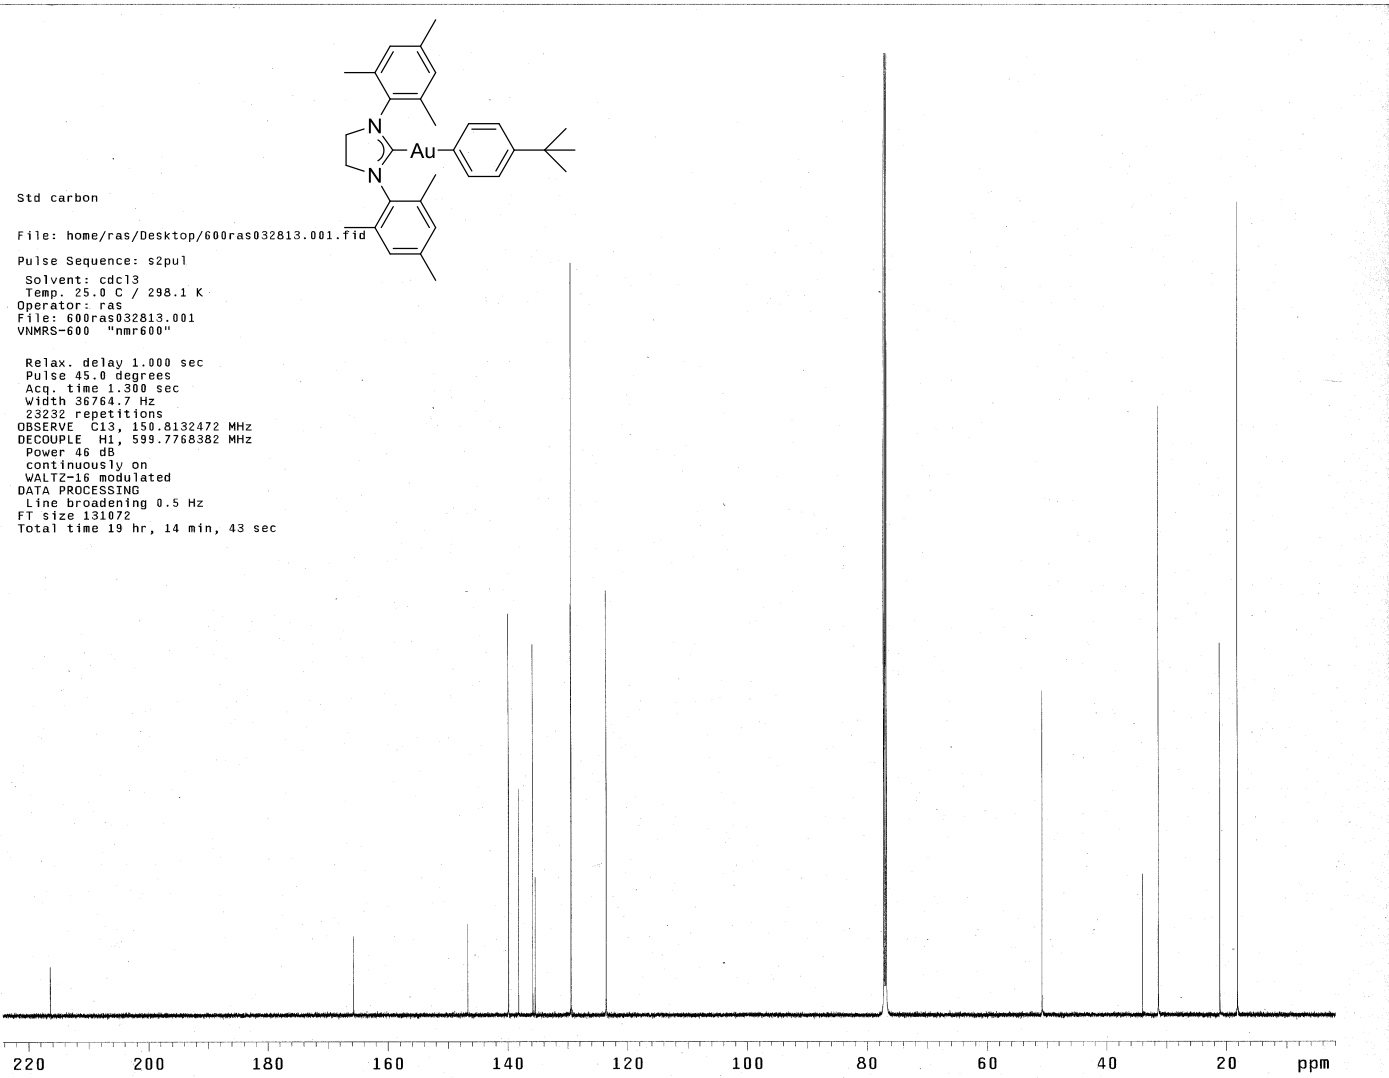

Sample Name:

Data Collected on:  
nmr600-vnmrs600  
Archive directory:

Sample directory:

FidFile: 600ras052913.004

Pulse Sequence: PROTON (s2pul)  
Solvent: cdcl3  
Data collected on: May 28 2013

Temp. 25.0 C / 298.1 K  
Operator: ras

Relax. delay 1.000 sec  
Pulse 45.0 degrees  
Acq. time 1.704 sec  
Width 9615.4 Hz  
Single scan  
OBSERVE H1, 599.7738340 MHz  
DATA PROCESSING  
FT size 32768  
Total time 0 min 3 sec

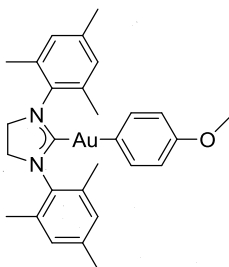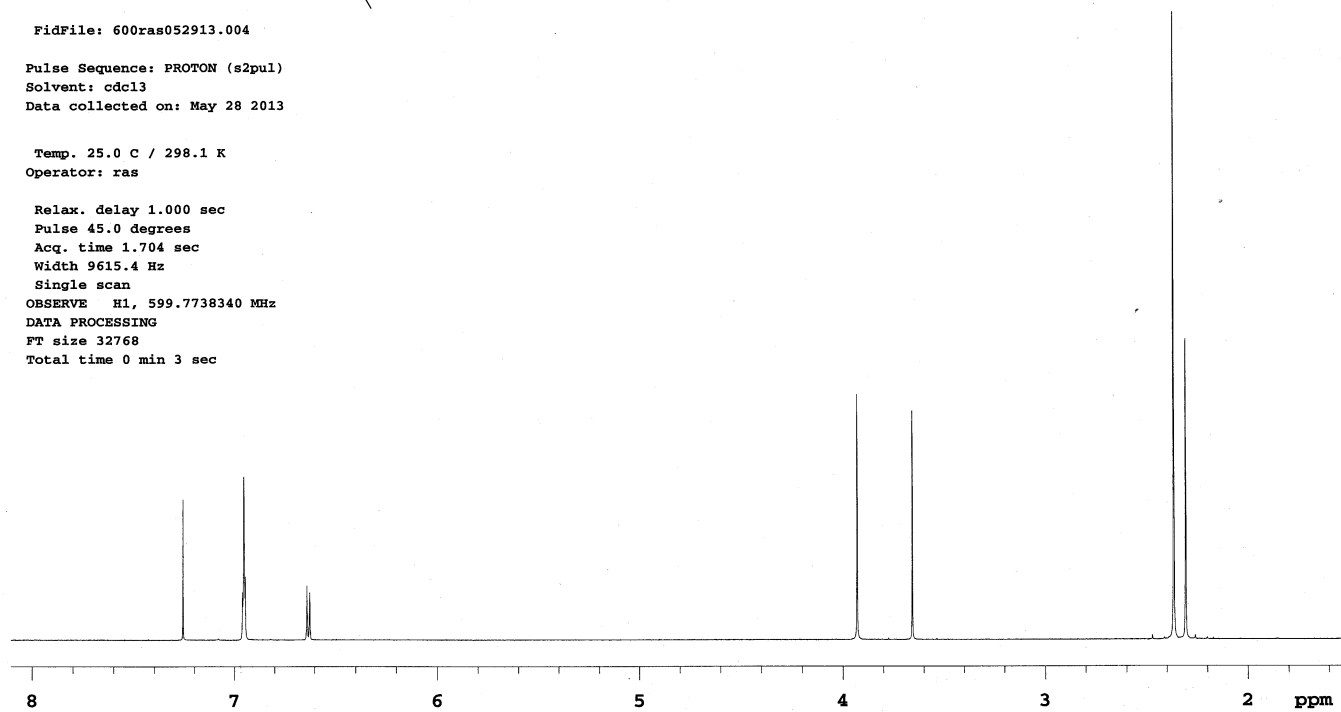

Sample Name:  
Data Collected on:  
nmr600-vnmrs600  
Archive directory:

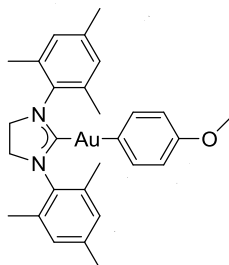

Sample directory:  
FidFile: 600ras052913.003  
Pulse Sequence: CARBON (s2pul)  
Solvent: cdc13  
Data collected on: May 28 2013

Temp. 25.0 C / 298.1 K  
Operator: ras

Relax. delay 1.000 sec  
Pulse 45.0 degrees  
Acq. time 0.865 sec  
Width 37878.8 Hz  
35408 repetitions  
OBSERVE C13, 150.8132472 MHz  
DECOUPLE H1, 599.7768382 MHz  
Power 46 dB  
continuously on  
WALTZ-16 modulated  
DATA PROCESSING  
Line broadening 0.5 Hz  
FT size 65536  
Total time 129 hr, 31 min

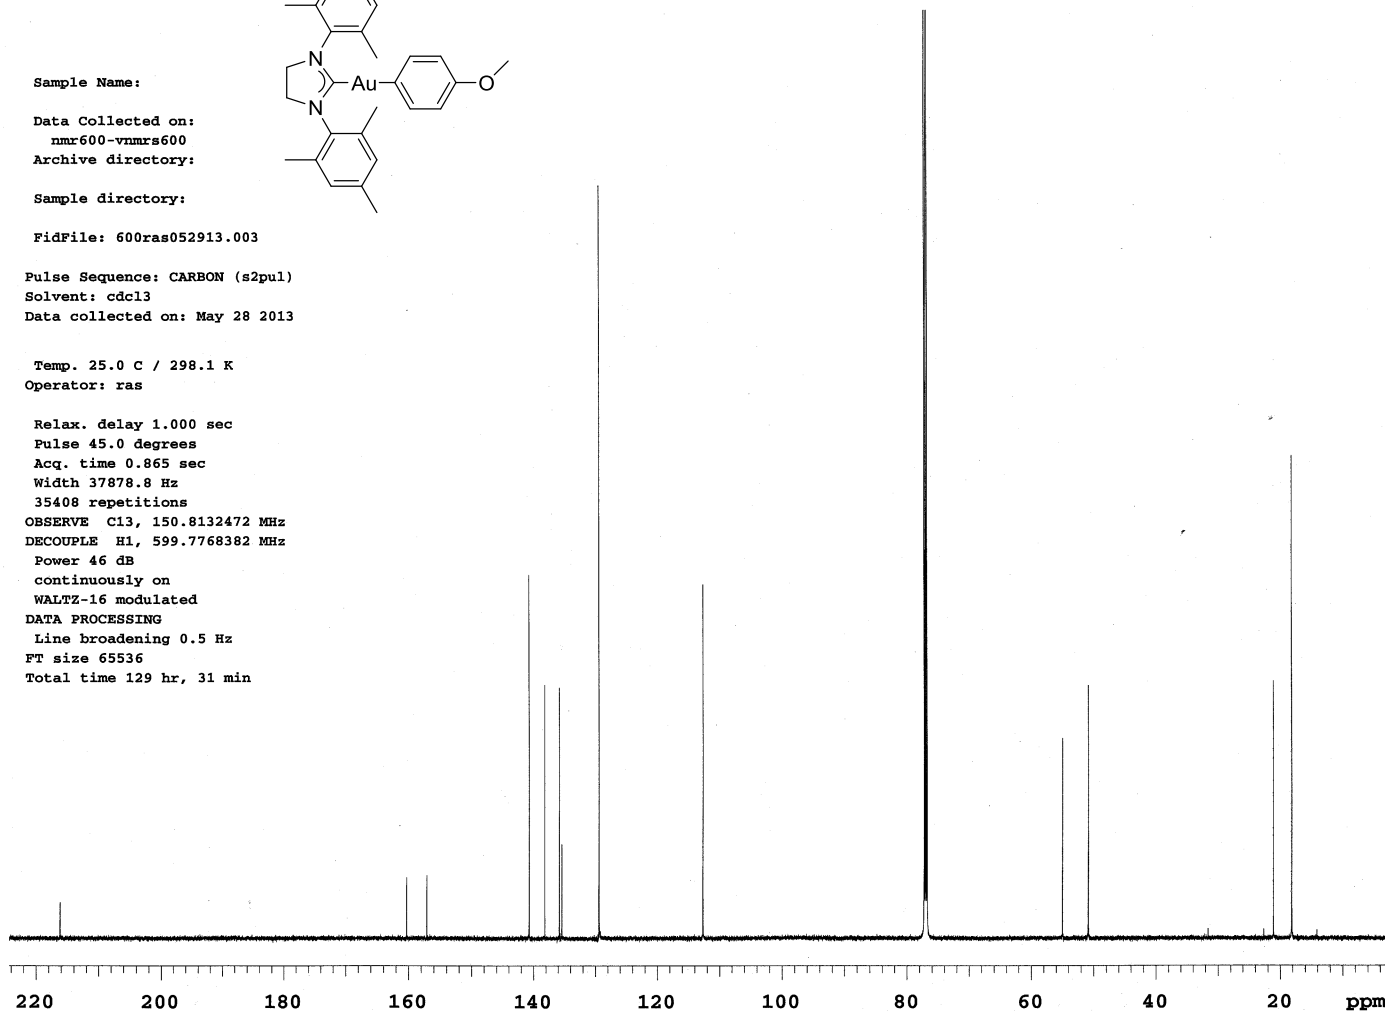

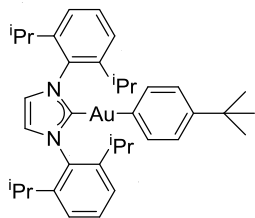

Sample Name:

Data Collected on:  
nmr600-vmrs600  
Archive directory:

Sample directory:

FidFile: 600ras061313.007

Pulse Sequence: PROTON (s2pul)  
Solvent: cdcl3  
Data collected on: Jun 14 2013

Temp. 25.0 C / 298.1 K  
Operator: ras

Relax. delay 1.000 sec  
Pulse 45.0 degrees  
Acq. time 1.704 sec  
Width 9615.4 Hz  
Single scan  
OBSERVE H1, 599.7738340 MHz  
DATA PROCESSING  
FT size 32768  
Total time 0 min 3 sec

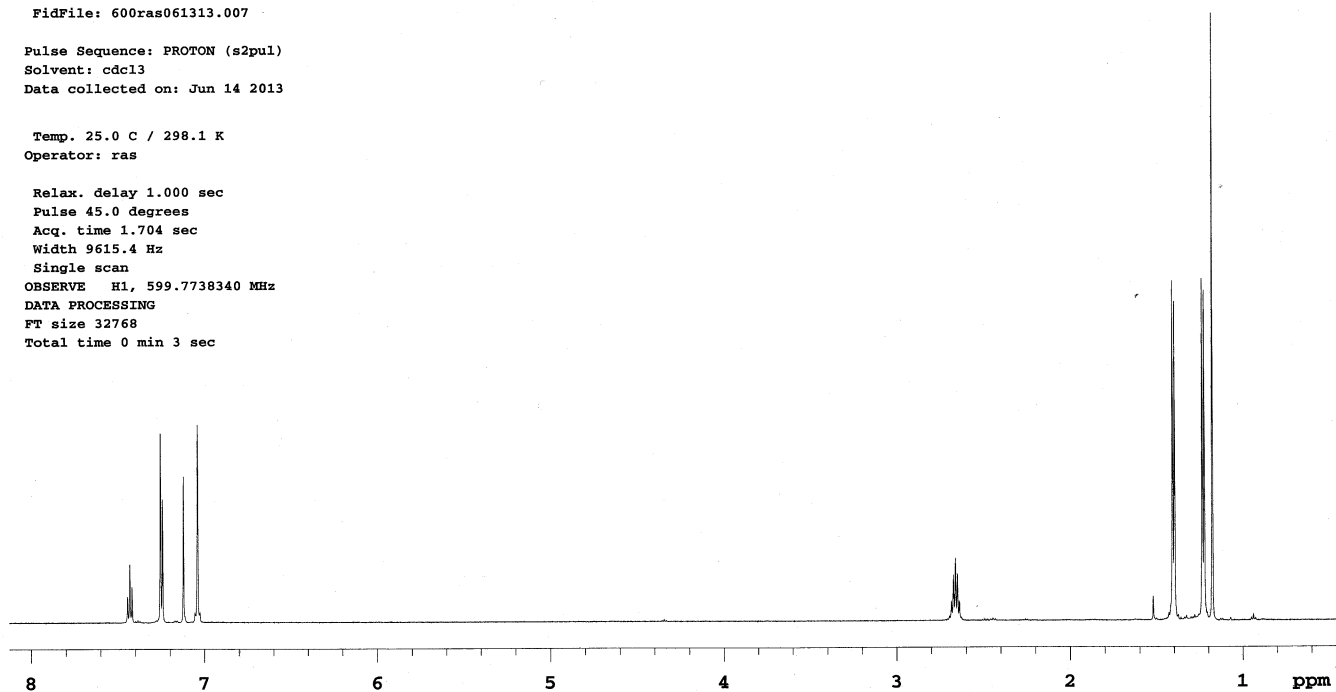

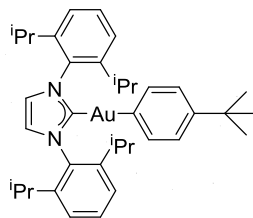

Sample Name:

Data Collected on:  
nmr600-vnmrs600  
Archive directory:

Sample directory:

FidFile: 600ras052913.009

Pulse Sequence: CARBON (s2pul)  
Solvent: cdcl3  
Data collected on: May 29 2013

Temp. 25.0 C / 298.1 K  
Operator: ras

Relax. delay 1.000 sec  
Pulse 45.0 degrees  
Acq. time 0.865 sec  
Width 37878.8 Hz  
23360 repetitions  
OBSERVE C13, 150.8132472 MHz  
DECOUPLE H1, 599.7768382 MHz  
Power 46 dB  
continuously on  
WALTZ-16 modulated  
DATA PROCESSING  
Line broadening 0.5 Hz  
FT size 65536  
Total time 129 hr, 31 min

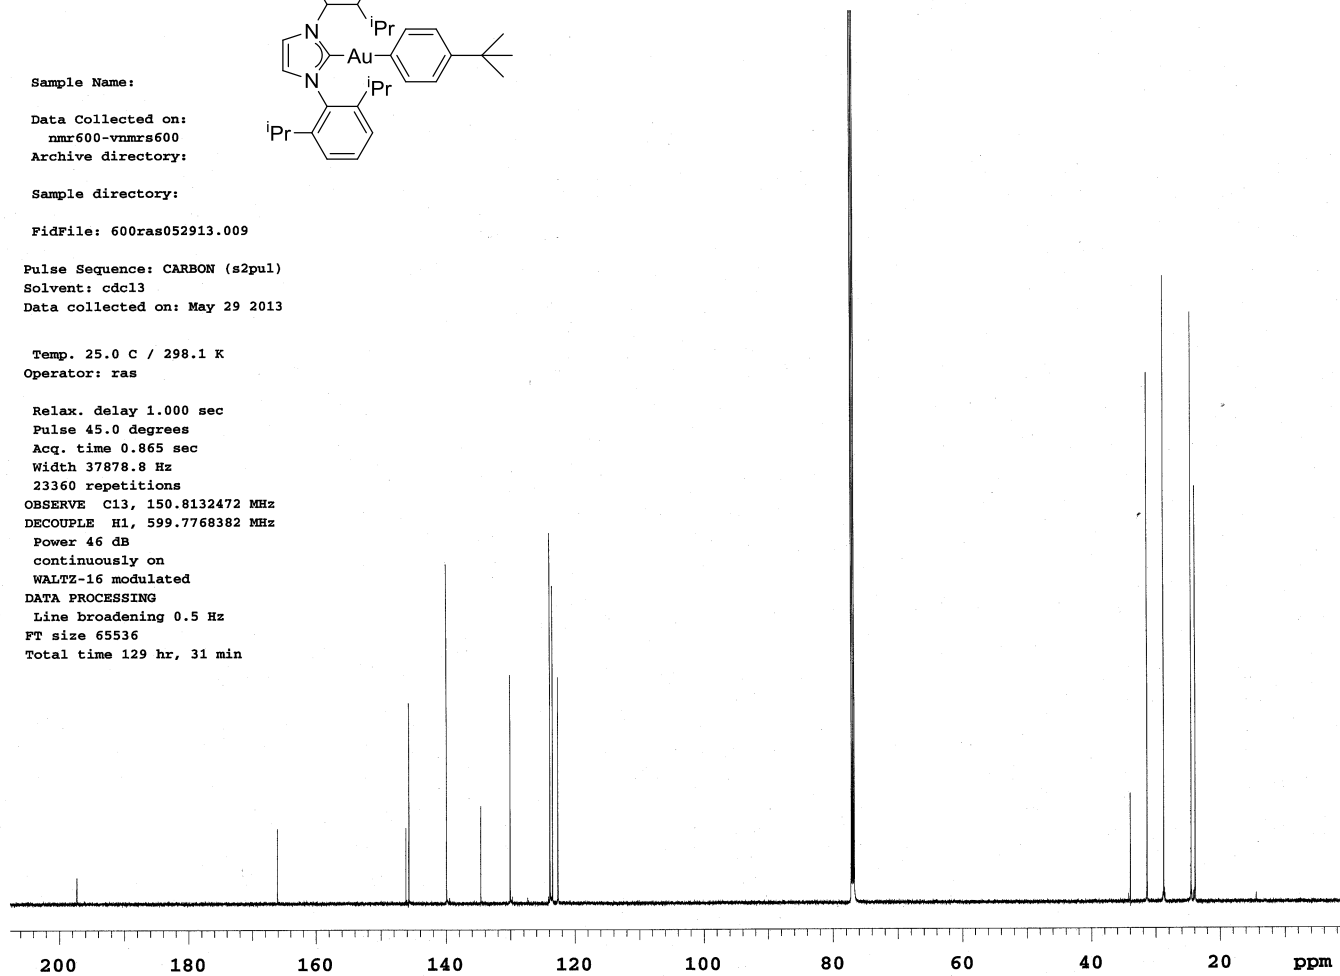

Sample Name:  
Data Collected on:  
nmr600-vmnrs600  
Archive directory:  
Sample directory:

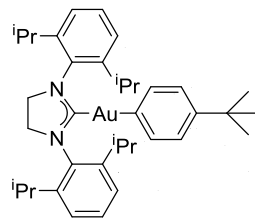

FidFile: 600ras061313.008

Pulse Sequence: PROTON (s2pul)  
Solvent: cdcl3  
Data collected on: Jun 14 2013

Temp. 25.0 C / 298.1 K  
Operator: ras

Relax. delay 1.000 sec  
Pulse 45.0 degrees  
Acq. time 1.704 sec  
Width 9615.4 Hz  
Single scan  
OBSERVE H1, 599.7738340 MHz  
DATA PROCESSING  
FT size 32768  
Total time 0 min 3 sec

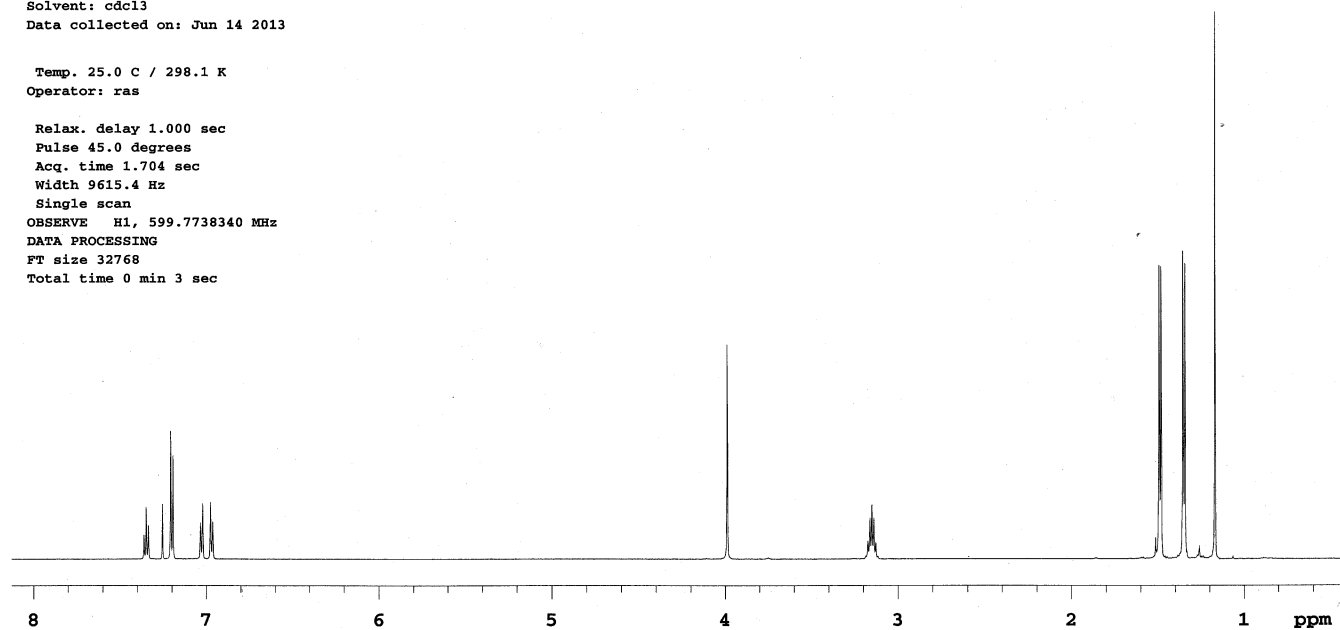

Std proton

Sample Name:

Data Collected on:  
nmr600-vmrs600

Archive directory:

Sample directory:

FidFile: 600ras061313.001

Pulse Sequence: CARBON (s2pu1)  
Solvent: cdcl3  
Data collected on: Jun 12 2013

Temp. 25.0 C / 298.1 K  
Operator: ras

Relax. delay 1.000 sec  
Pulse 45.0 degrees  
Acq. time 0.865 sec  
Width 44642.9 Hz  
25000 repetitions  
OBSERVE C13, 150.8132519 MHz  
DECOUPLE H1, 599.7768382 MHz  
Power 46 dB  
continuously on  
WALTZ-16 modulated  
DATA PROCESSING  
Line broadening 0.5 Hz  
FT size 131072  
Total time 12 hr, 57 min

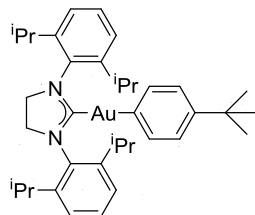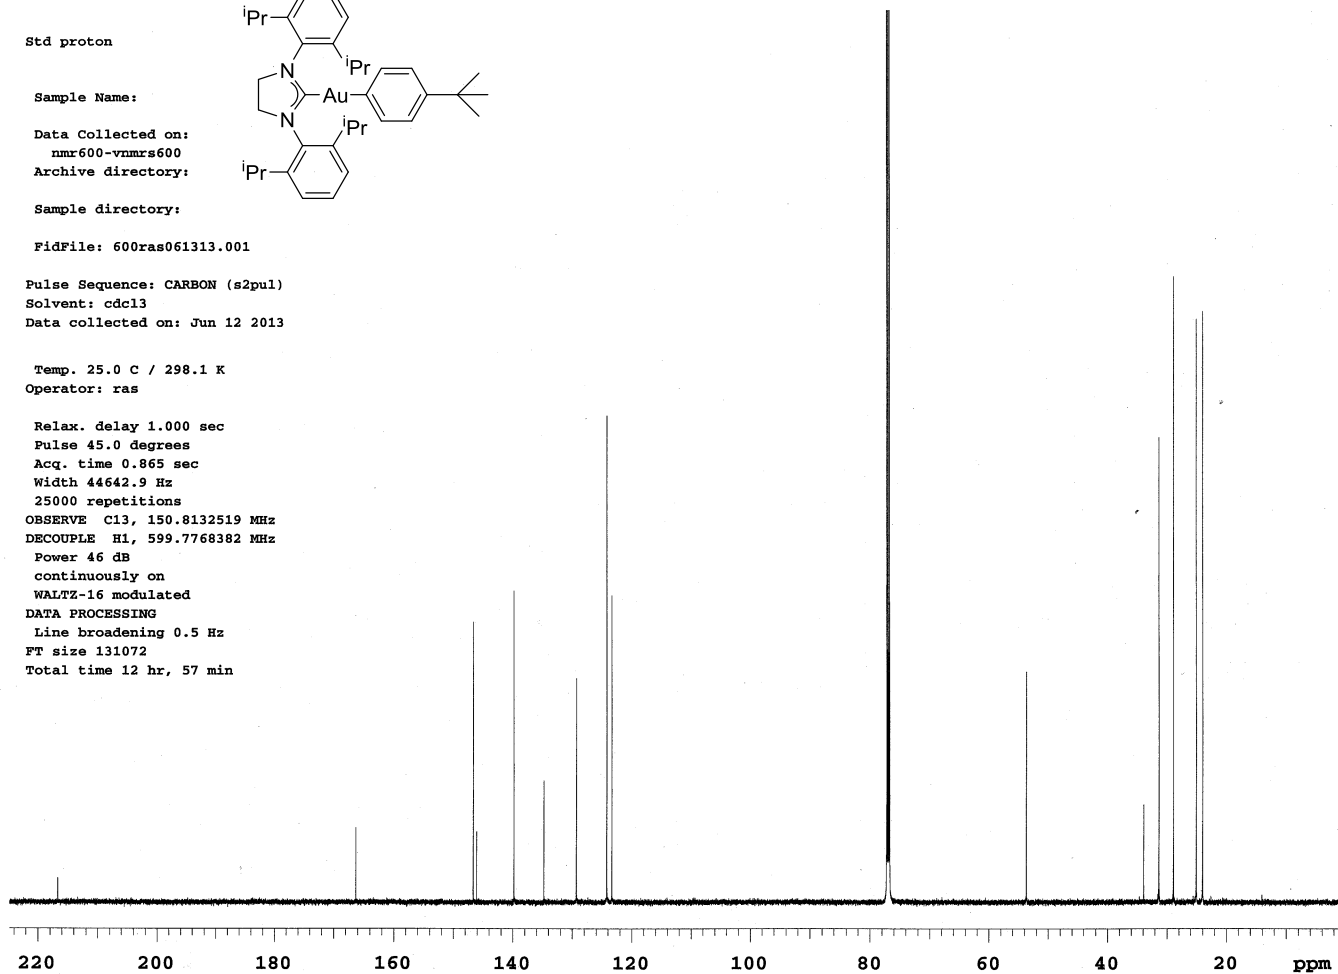

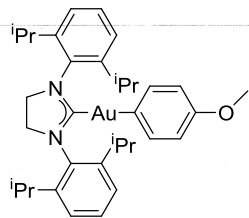

Sample Name:

Data Collected on:

nmr600-vnmrs600

Archive directory:

Sample directory:

FidFile: 600ras061413.008

Pulse Sequence: PROTON (s2pul)

Solvent: cdcl3

Data collected on: Jun 18 2013

Temp. 25.0 C / 298.1 K

Operator: ras

Relax. delay 1.000 sec

Pulse 45.0 degrees

Acq. time 1.704 sec

Width 9615.4 Hz

Single scan

OBSERVE H1, 599.7738327 MHz

DATA PROCESSING

FT size 32768

Total time 0 min 3 sec

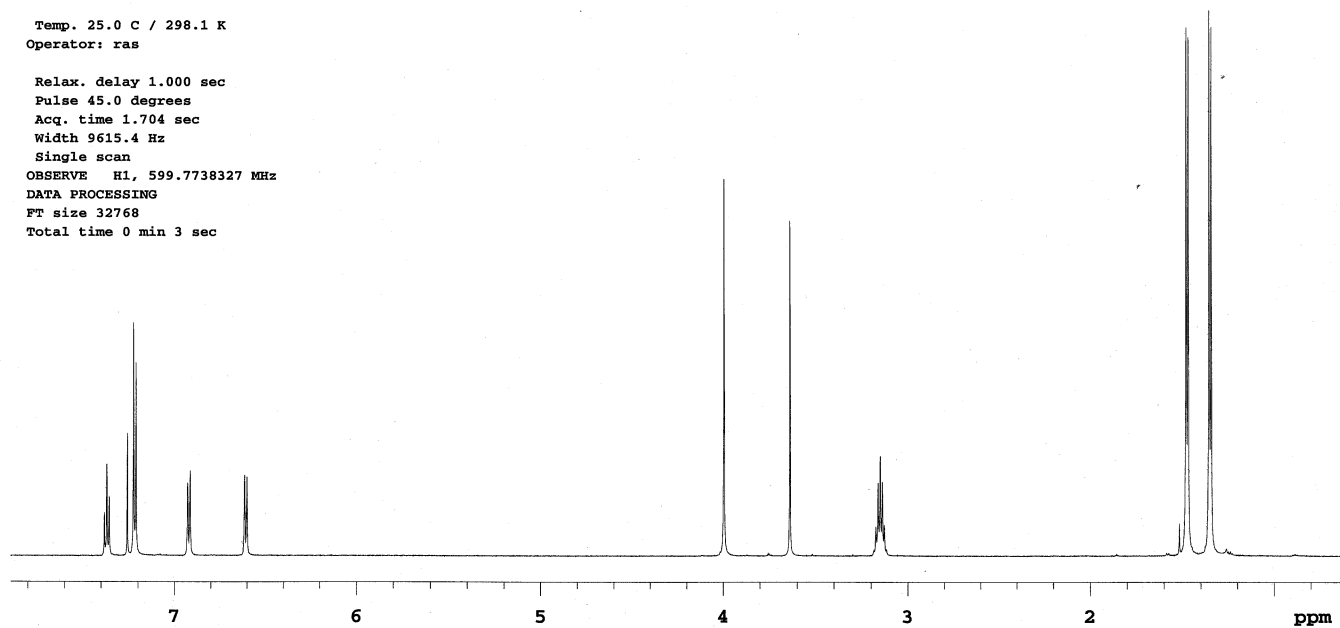



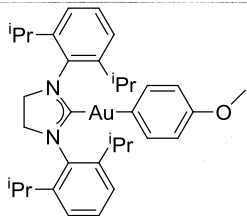

Sample Name:

Data Collected on:

nmr600-vnmrs600

Archive directory:

Sample directory:

FidFile: 600ras061913.001

Pulse Sequence: CARBON (s2pul)

Solvent: cdcl3

Data collected on: Jun 18 2013

Temp. 25.0 C / 298.1 K

Operator: ras

Relax. delay 1.000 sec

Pulse 45.0 degrees

Acq. time 0.865 sec

Width 37878.8 Hz

28576 repetitions

OBSERVE C13, 150.8132478 MHz

DECOUPLE H1, 599.7768382 MHz

Power 46 dB

continuously on

WALTZ-16 modulated

DATA PROCESSING

Line broadening 0.5 Hz

FT size 65536

Total time 129 hr, 31 min

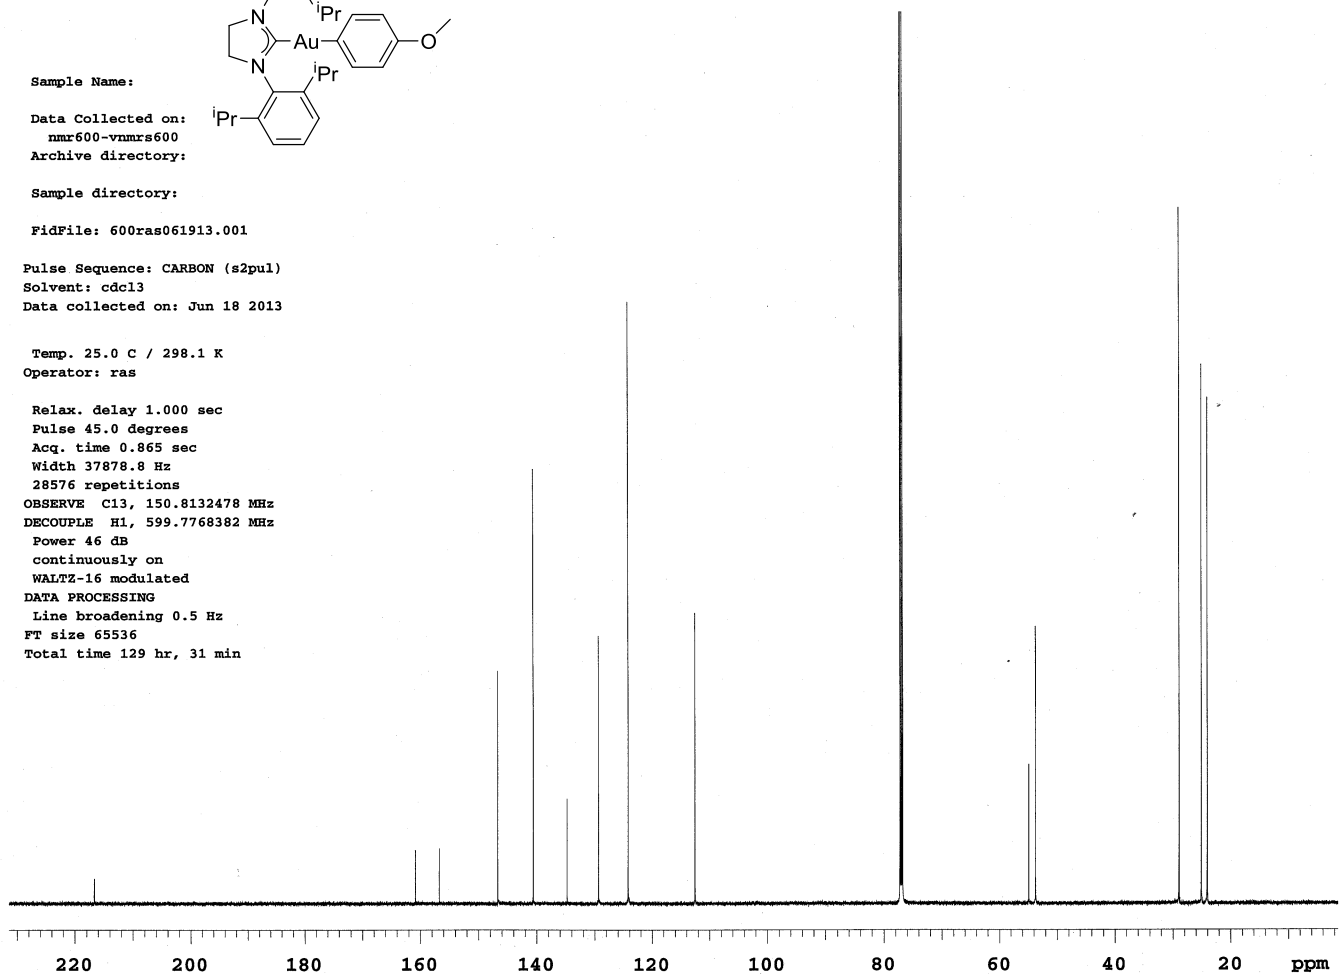

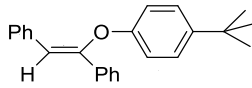

Sample Name:

Data Collected on:  
nmr600-vnmrs600  
Archive directory:

Sample directory:

FidFile: 600ras062613.006

Pulse Sequence: PROTON (s2pul)  
Solvent: cdcl3  
Data collected on: Jun 27 2013

Temp. 25.0 C / 298.1 K  
Operator: ras

Relax. delay 1.000 sec  
Pulse 45.0 degrees  
Acq. time 1.704 sec  
Width 9615.4 Hz  
Single scan  
OBSERVE H1, 599.7738483 MHz  
DATA PROCESSING  
FT size 32768  
Total time 0 min 3 sec

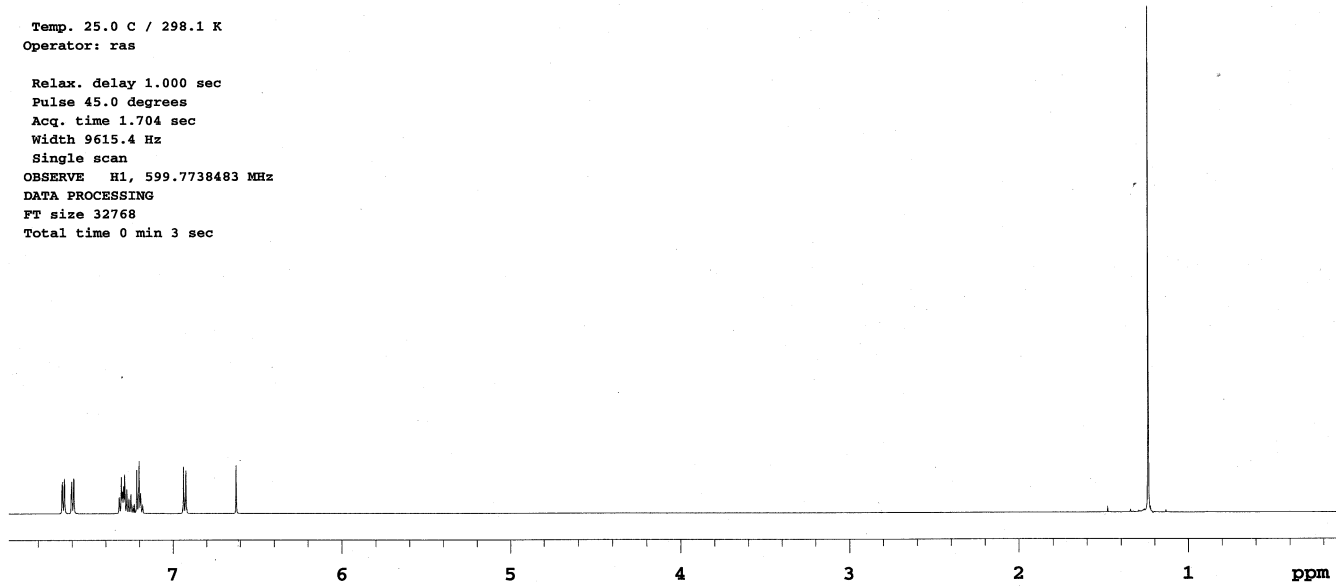

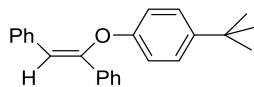

Sample Name:

Data Collected on:  
nmr600-vnmrs600  
Archive directory:

Sample directory:

FidFile: 600ras062513.012

Pulse Sequence: CARBON (s2pul)  
Solvent: cdcl3  
Data collected on: Jun 25 2013

Temp. 25.0 C / 298.1 K  
Operator: ras

Relax. delay 1.000 sec  
Pulse 45.0 degrees  
Acq. time 0.865 sec  
Width 37878.8 Hz  
27328 repetitions  
OBSERVE C13, 150.8132482 MHz  
DECOUPLE H1, 599.7768382 MHz  
Power 46 dB  
continuously on  
WALTZ-16 modulated  
DATA PROCESSING  
Line broadening 0.5 Hz  
FT size 65536  
Total time 129 hr, 31 min

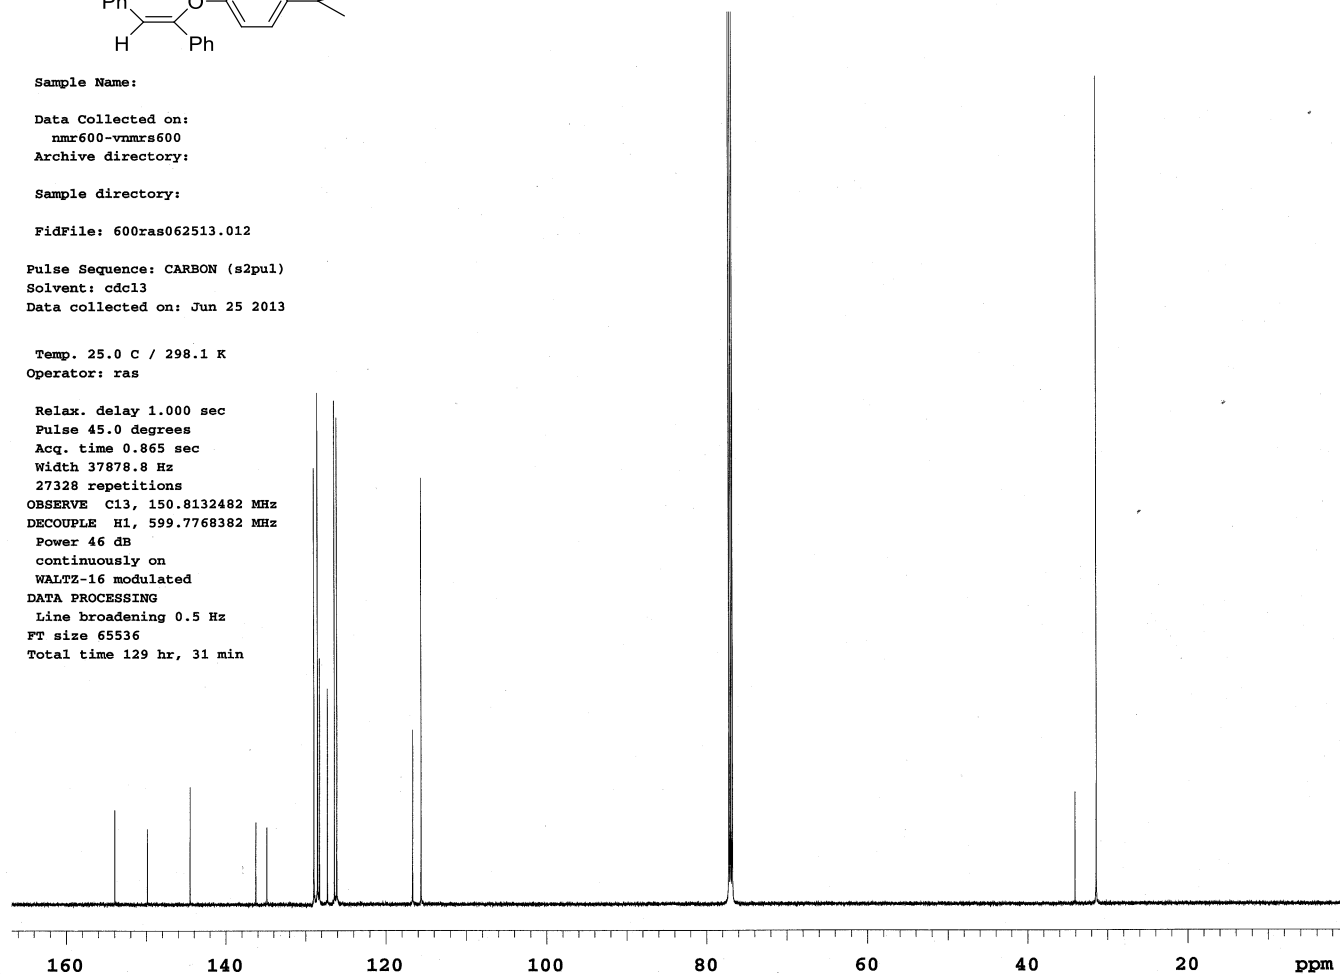

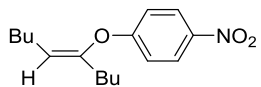

Sample Name:

Data Collected on:  
nmr600-vnmrs600  
Archive directory:

Sample directory:

FidFile: 600ras062613.011

Pulse Sequence: PROTON (s2pul)  
Solvent: cdcl3  
Data collected on: Jun 27 2013

Temp. 25.0 C / 298.1 K  
Operator: ras

Relax. delay 1.000 sec  
Pulse 45.0 degrees  
Acq. time 1.704 sec  
Width 9615.4 Hz  
Single scan  
OBSERVE H1, 599.7738423 MHz  
DATA PROCESSING  
FT size 32768  
Total time 0 min 3 sec

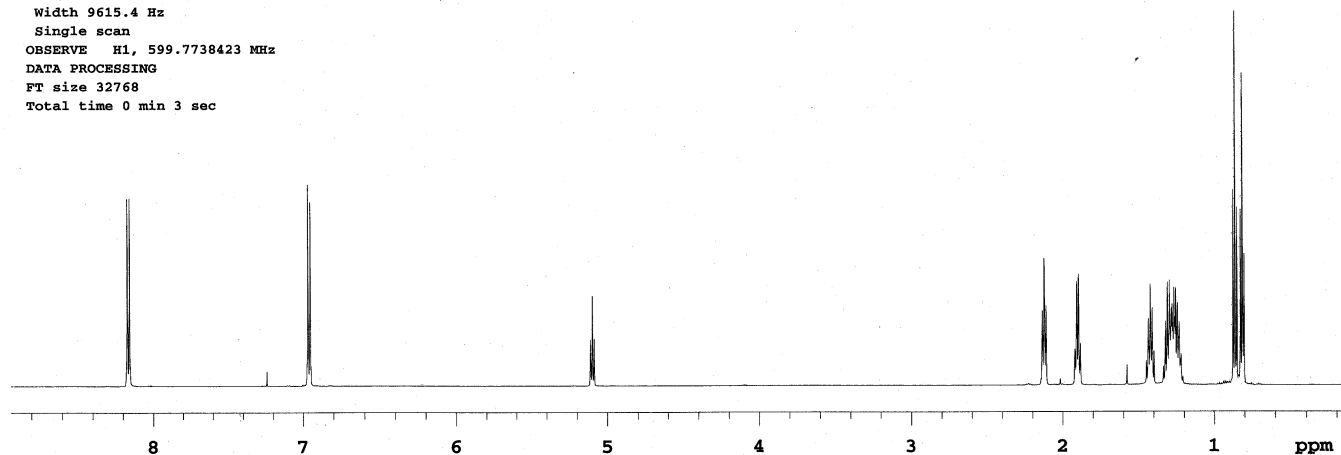

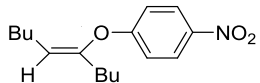

Sample Name:

Data Collected on:  
nmr600-vnmrs600  
Archive directory:

Sample directory:

FidFile: 600ras062413.010

Pulse Sequence: CARBON (s2pul)  
Solvent: cdcl3  
Data collected on: Jun 24 2013

Temp. 25.0 C / 298.1 K  
Operator: ras

Relax. delay 1.000 sec  
Pulse 45.0 degrees  
Acq. time 0.865 sec  
Width 37878.8 Hz  
21424 repetitions  
OBSERVE C13, 150.8132455 MHz  
DECOUPLE H1, 599.7768382 MHz  
Power 46 dB  
continuously on  
WALTZ-16 modulated  
DATA PROCESSING  
Line broadening 0.5 Hz  
FT size 65536  
Total time 129 hr, 31 min

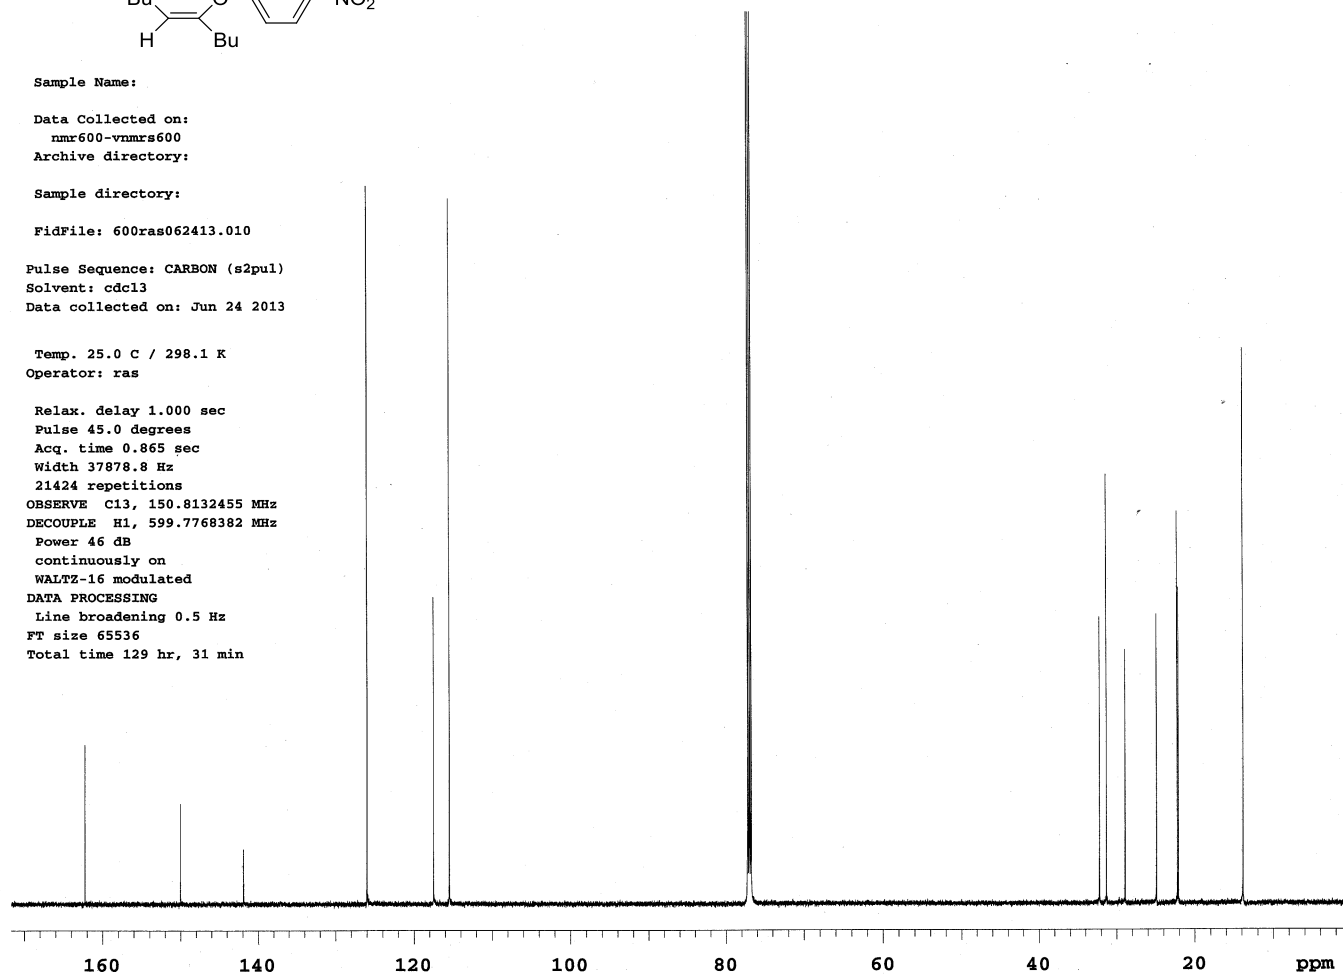

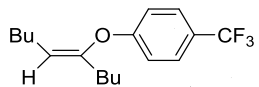

Sample Name:

Data Collected on:  
nmr600-vnmrs600  
Archive directory:

Sample directory:

FidFile: 600ras062513.008

Pulse Sequence: PROTON (s2pul)  
Solvent: cdcl3  
Data collected on: Jun 25 2013

Temp. 25.0 C / 298.1 K  
Operator: ras

Relax. delay 1.000 sec  
Pulse 45.0 degrees  
Acq. time 1.704 sec  
Width 9615.4 Hz  
Single scan  
OBSERVE H1, 599.7738393 MHz  
DATA PROCESSING  
FT size 32768  
Total time 0 min 3 sec

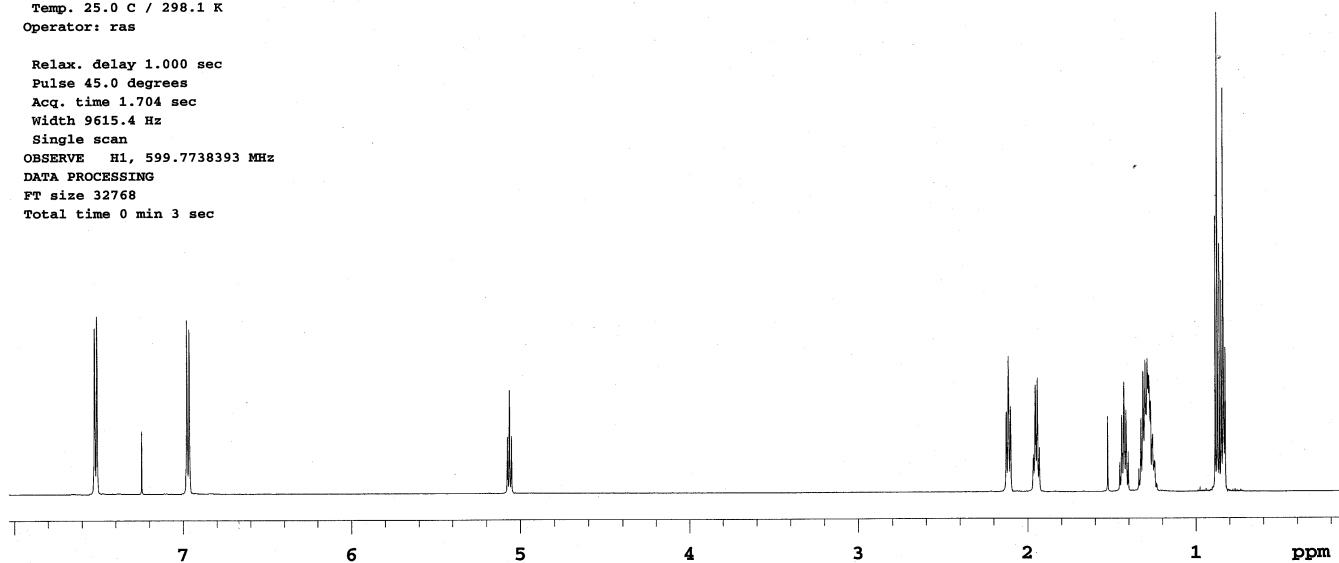

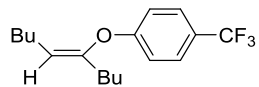

Sample Name:

Data Collected on:  
nmr600-vnmrs600  
Archive directory:

Sample directory:

FidFile: 600ras062513.009

Pulse Sequence: CARBON (s2pul)  
Solvent: cdcl3  
Data collected on: Jun 25 2013

Temp. 25.0 C / 298.1 K  
Operator: ras

Relax. delay 1.000 sec  
Pulse 45.0 degrees  
Acq. time 0.865 sec  
Width 37878.8 Hz  
1984 repetitions  
OBSERVE C13, 150.8132482 MHz  
DECOUPLE H1, 599.7768382 MHz  
Power 46 dB  
continuously on  
WALTZ-16 modulated  
DATA PROCESSING  
Line broadening 0.5 Hz  
FT size 65536  
Total time 129 hr, 31 min

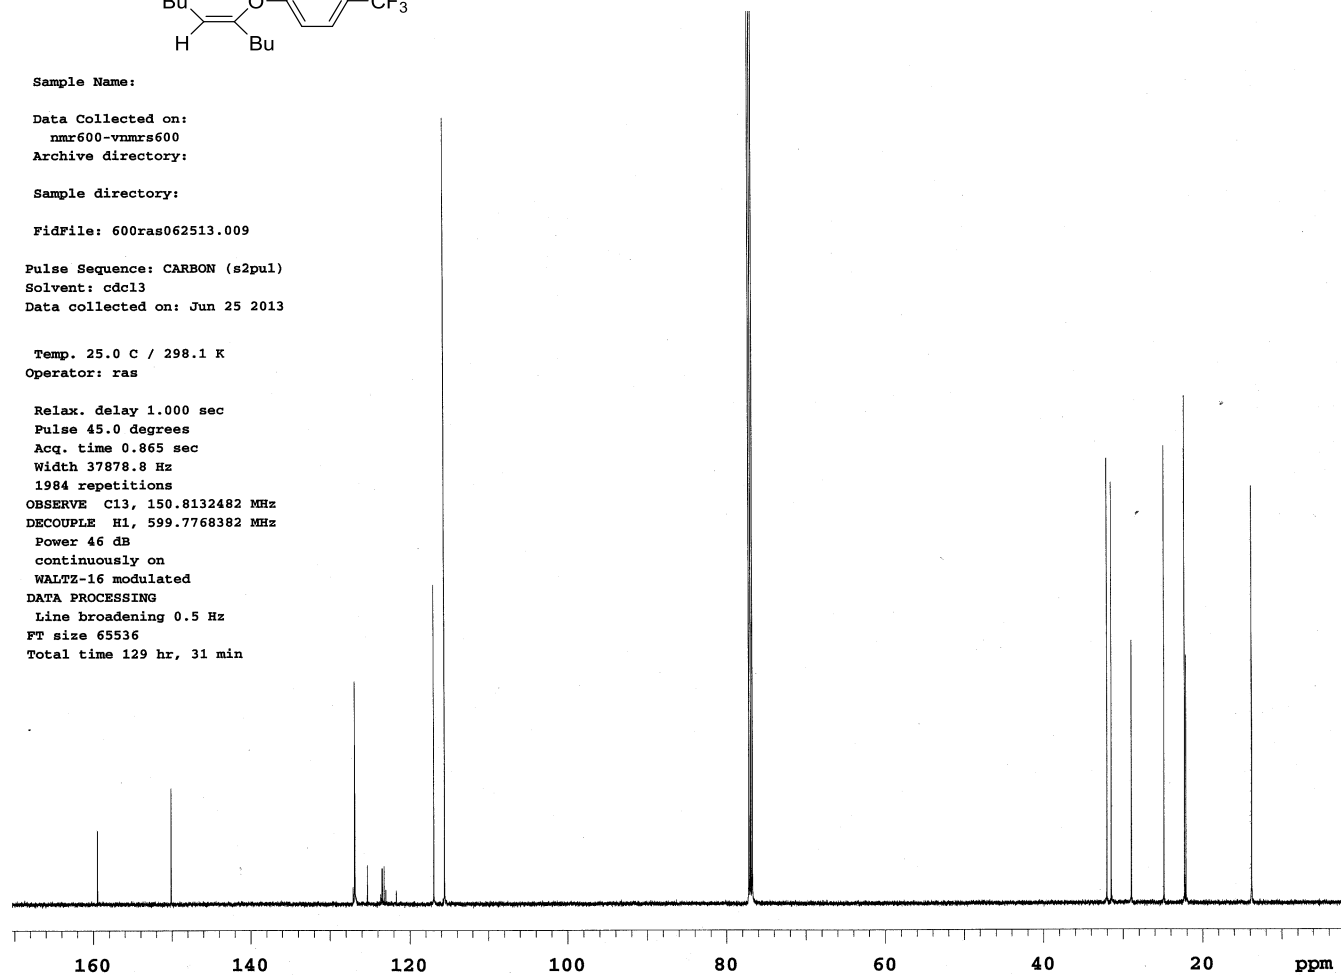

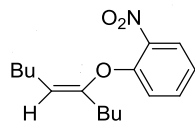

Sample Name:

Data Collected on:  
nmr600-vnmrs600  
Archive directory:

Sample directory:

FidFile: 600ras062513.019

Pulse Sequence: PROTON (s2pul)  
Solvent: cdcl3  
Data collected on: Jun 26 2013

Temp. 25.0 C / 298.1 K  
Operator: ras

Relax. delay 1.000 sec  
Pulse 45.0 degrees  
Acq. time 1.704 sec  
Width 9615.4 Hz  
Single scan  
OBSERVE H1, 599.7738310 MHz  
DATA PROCESSING  
FT size 32768  
Total time 0 min 3 sec

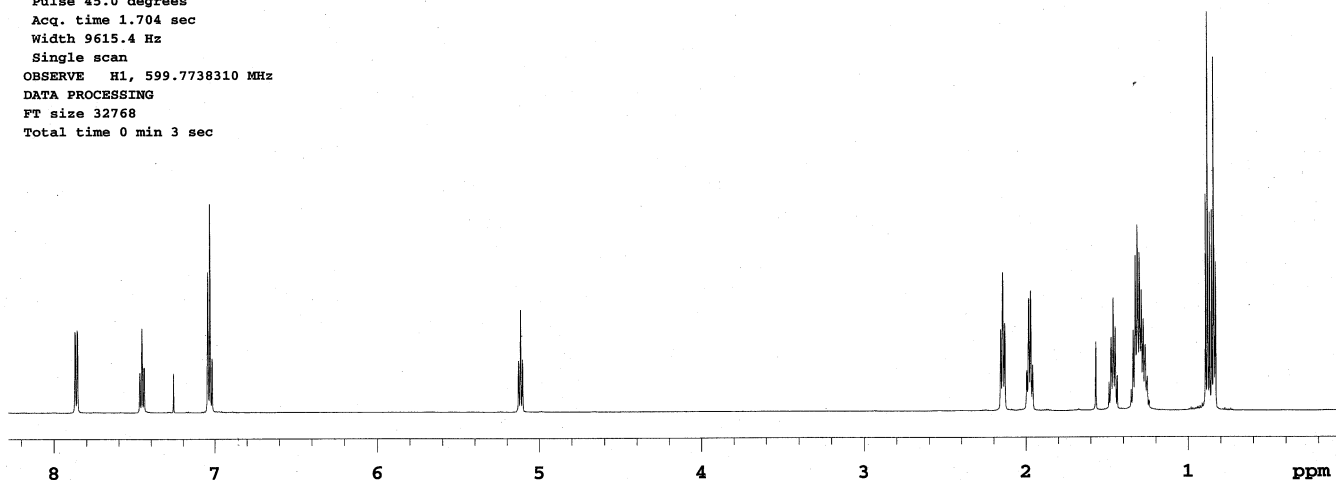



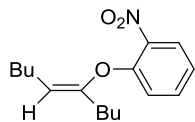

Sample Name:

Data Collected on:  
nmr600-vnmrs600  
Archive directory:

Sample directory:

FidFile: 600ras062513.020

Pulse Sequence: CARBON (s2pul)  
Solvent: cdcl3  
Data collected on: Jun 26 2013

Temp. 25.0 C / 298.1 K  
Operator: ras

Relax. delay 1.000 sec  
Pulse 45.0 degrees  
Acq. time 0.865 sec  
Width 37878.8 Hz  
624 repetitions  
OBSERVE C13, 150.8132535 MHz  
DECOUPLE H1, 599.7768382 MHz  
Power 46 dB  
continuously on  
WALTZ-16 modulated  
DATA PROCESSING  
Line broadening 0.5 Hz  
FT size 65536  
Total time 129 hr, 31 min

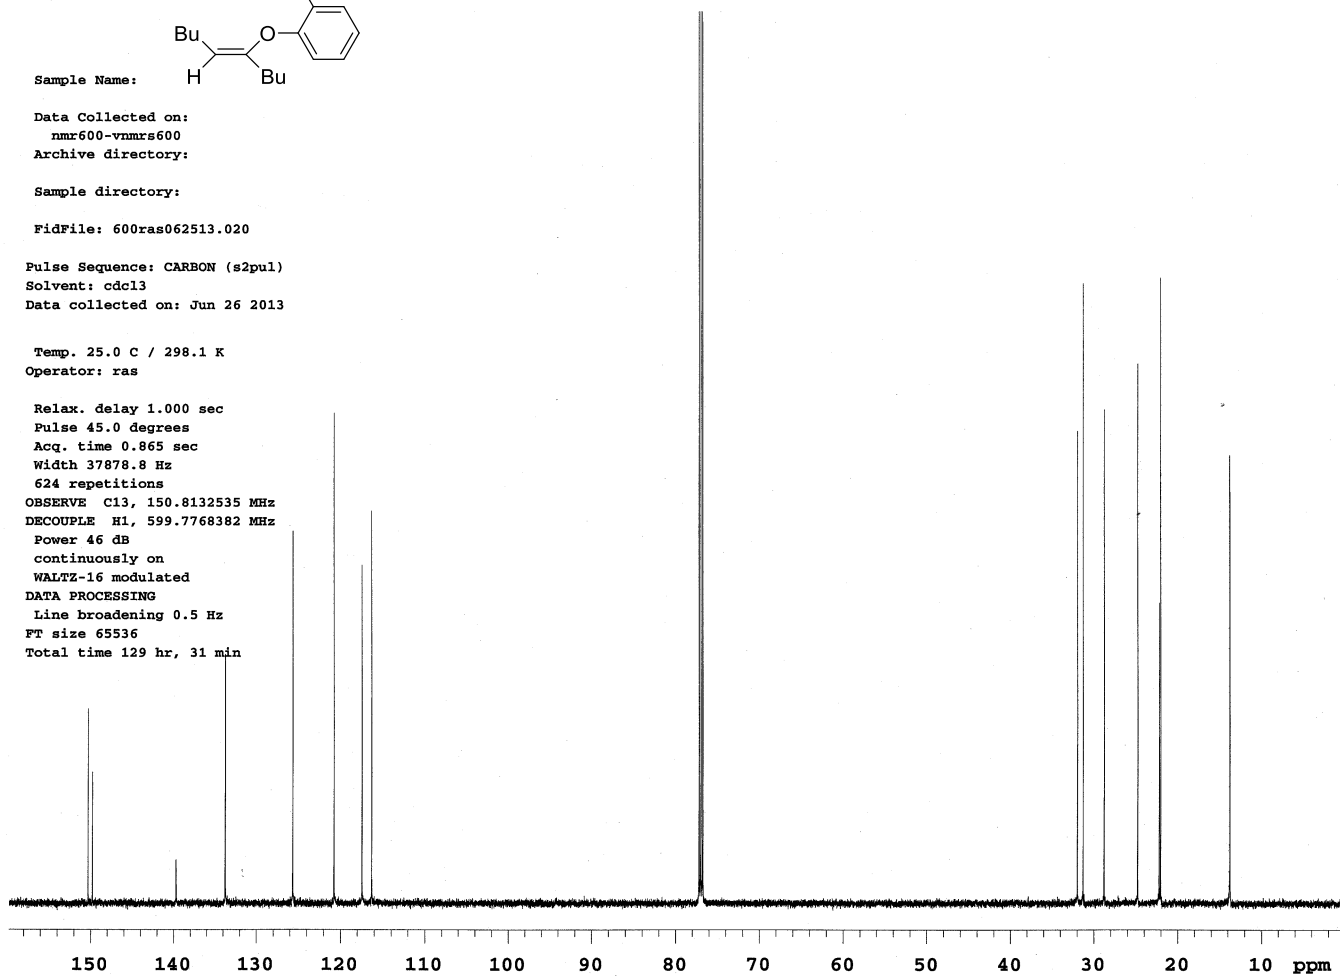

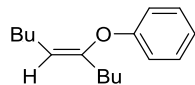

Sample Name:

Data Collected on:  
nmr600-vnmrs600  
Archive directory:

Sample directory:

FidFile: 600ras062613.001

Pulse Sequence: PROTON (s2pul)  
Solvent: cdcl3  
Data collected on: Jun 27 2013

Temp. 25.0 C / 298.1 K  
Operator: ras

Relax. delay 1.000 sec  
Pulse 45.0 degrees  
Acq. time 1.704 sec  
Width 9615.4 Hz  
Single scan  
OBSERVE H1, 599.7738310 MHz  
DATA PROCESSING  
F1 size 32768  
Total time 0 min 3 sec

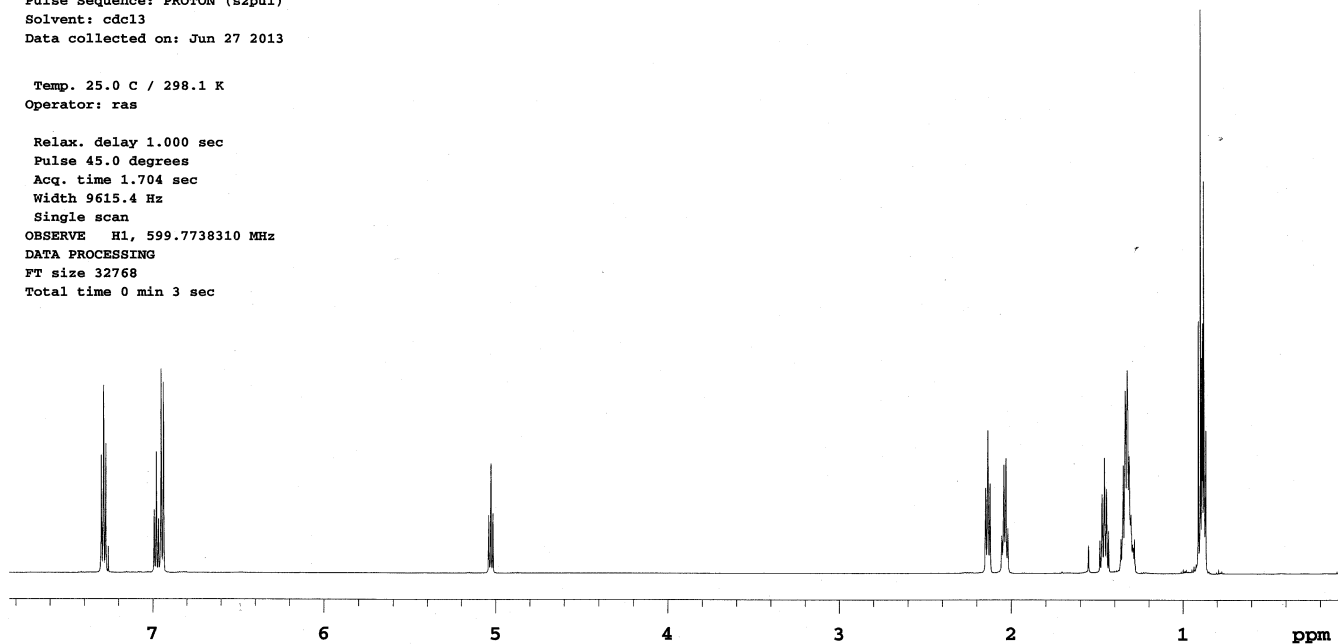

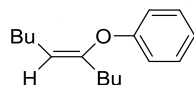

Sample Name:

Data Collected on:  
nmr600-vnmrs600  
Archive directory:

Sample directory:

FidFile: 600ras062613.002

Pulse Sequence: CARBON (s2pul)  
Solvent: cdcl3  
Data collected on: Jun 27 2013

Temp. 25.0 C / 298.1 K  
Operator: ras

Relax. delay 1.000 sec  
Pulse 45.0 degrees  
Acq. time 0.865 sec  
Width 37878.8 Hz  
64 repetitions  
OBSERVE C13, 150.8132526 MHz  
DECOUPLE H1, 599.7768382 MHz  
Power 46 dB  
continuously on  
WALTZ-16 modulated  
DATA PROCESSING  
Line broadening 0.5 Hz  
FT size 65536  
Total time 129 hr, 31 min

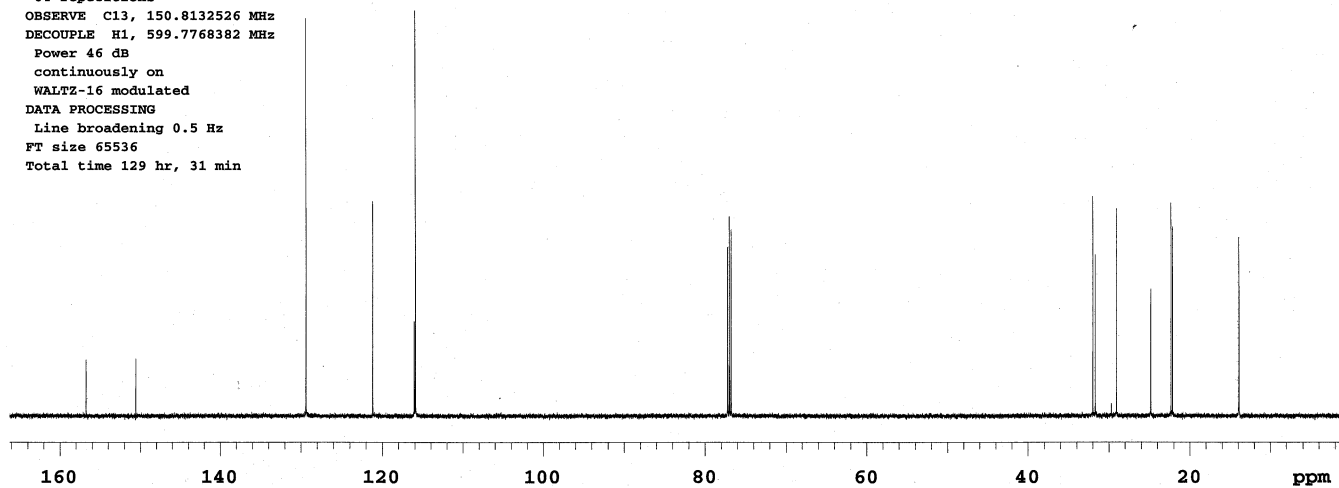

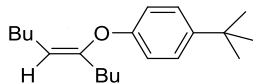

Sample Name:

Data Collected on:  
nmr600-vnmrs600  
Archive directory:

Sample directory:

FidFile: 600ras062513.004

Pulse Sequence: PROTON (s2pul)  
Solvent: cdcl3  
Data collected on: Jun 25 2013

Temp. 25.0 C / 298.1 K  
Operator: ras

Relax. delay 1.000 sec  
Pulse 45.0 degrees  
Acq. time 1.704 sec  
Width 9615.4 Hz  
Single scan  
OBSERVE H1, 599.7738393 MHz  
DATA PROCESSING  
FT size 32768  
Total time 0 min 3 sec

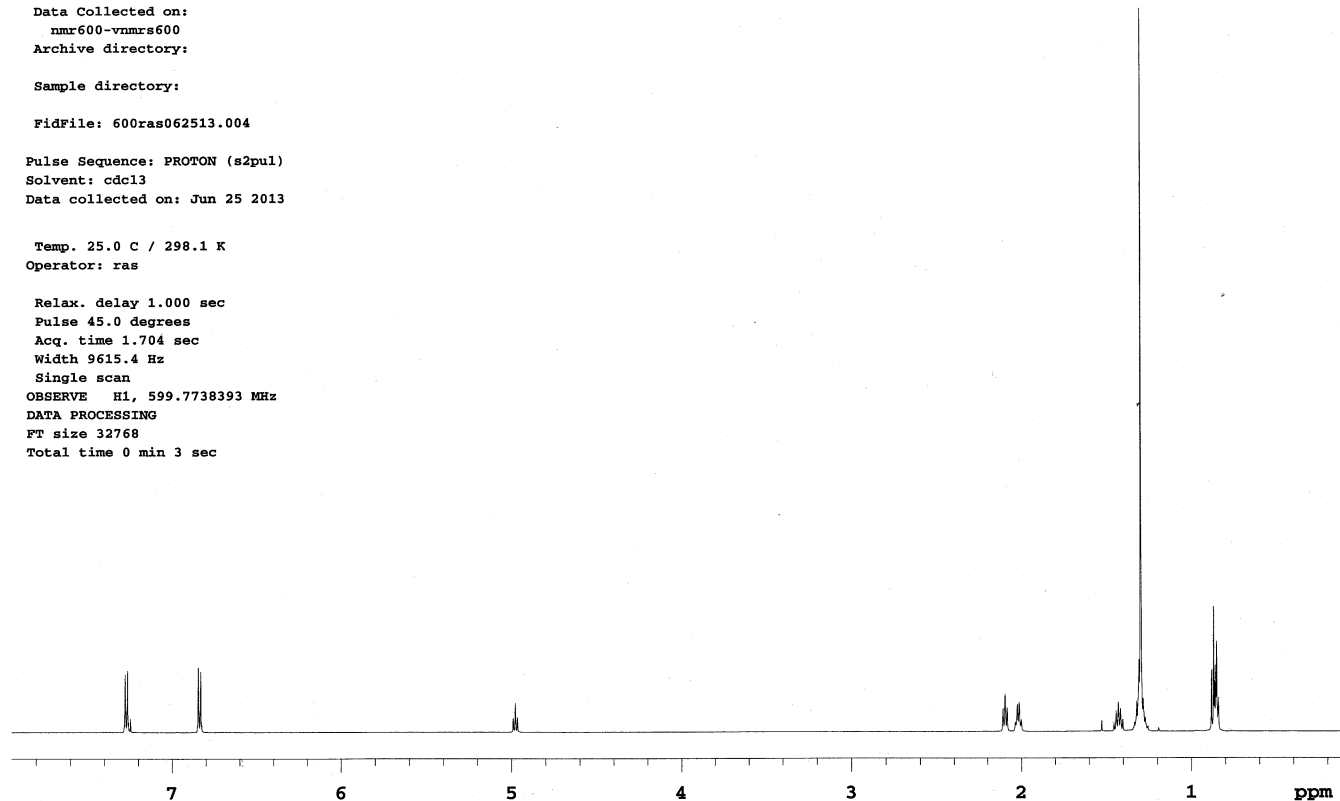

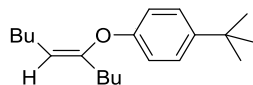

Sample Name:

Data Collected on:  
nmr600-vnmrs600  
Archive directory:

Sample directory:

FidFile: 600ras062513.005

Pulse Sequence: CARBON (s2pul)  
Solvent: cdcl3  
Data collected on: Jun 25 2013

Temp. 25.0 C / 298.1 K  
Operator: ras

Relax. delay 1.000 sec  
Pulse 45.0 degrees  
Acq. time 0.865 sec  
Width 37878.8 Hz  
624 repetitions  
OBSERVE C13, 150.8132455 MHz  
DECOUPLE H1, 599.7768382 MHz  
Power 46 dB  
continuously on  
WALTZ-16 modulated  
DATA PROCESSING  
Line broadening 0.5 Hz  
FT size 65536  
Total time 129 hr, 31 min

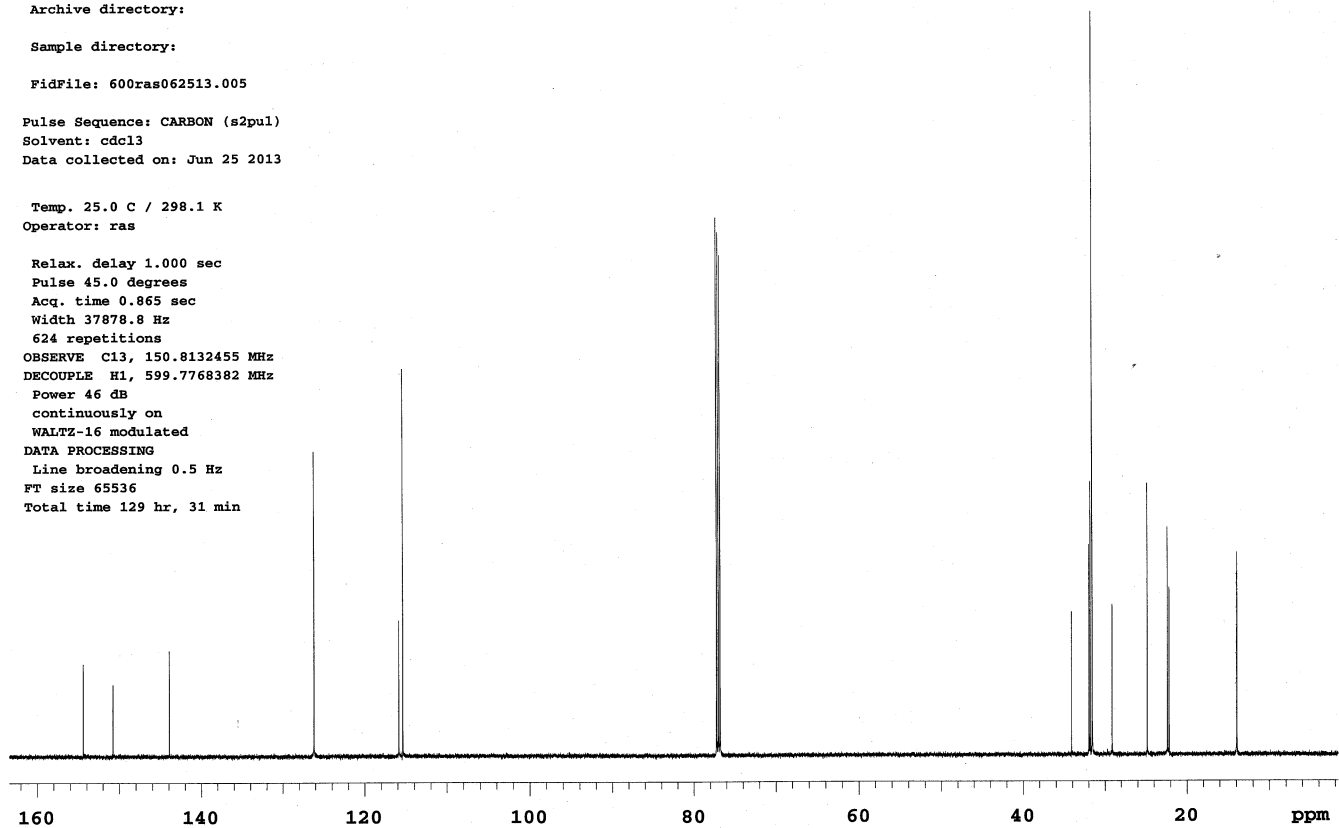

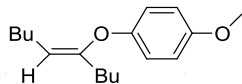

Sample Name:

Data Collected on:  
nmr600-vnmrs600  
Archive directory:

Sample directory:

FidFile: PROTON

Pulse Sequence: PROTON (s2pul)  
Solvent: cdcl3  
Data collected on: Jun 27 2013

Temp. 25.0 C / 298.1 K  
Operator: ras

Relax. delay 1.000 sec  
Pulse 45.0 degrees  
Acq. time 1.704 sec  
Width 9615.4 Hz  
Single scan  
OBSERVE H1, 599.7738483 MHz  
DATA PROCESSING  
FT size 32768  
Total time 0 min 3 sec

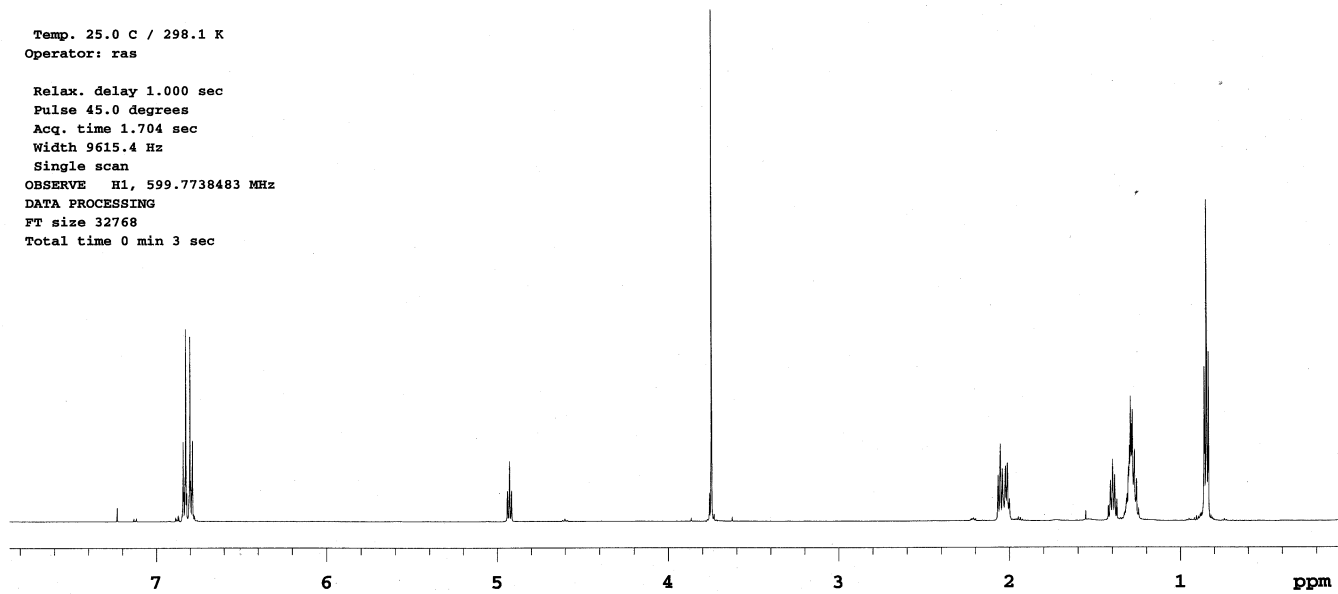

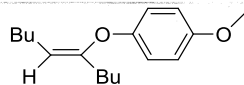

Sample Name:

Data Collected on:  
nmr600-vnmrs600  
Archive directory:

Sample directory:

FidFile: 600ras062413.002

Pulse Sequence: CARBON (s2pul)  
Solvent: cdcl3  
Data collected on: Jun 24 2013

Temp. 25.0 C / 298.1 K  
Operator: ras

Relax. delay 1.000 sec  
Pulse 45.0 degrees  
Acq. time 0.865 sec  
Width 37878.8 Hz  
384 repetitions  
OBSERVE C13, 150.8132510 MHz  
DECOUPLE H1, 599.7768382 MHz  
Power 46 dB  
continuously on  
WALTZ-16 modulated  
DATA PROCESSING  
Line broadening 0.5 Hz  
FT size 65536  
Total time 129 hr, 31 min

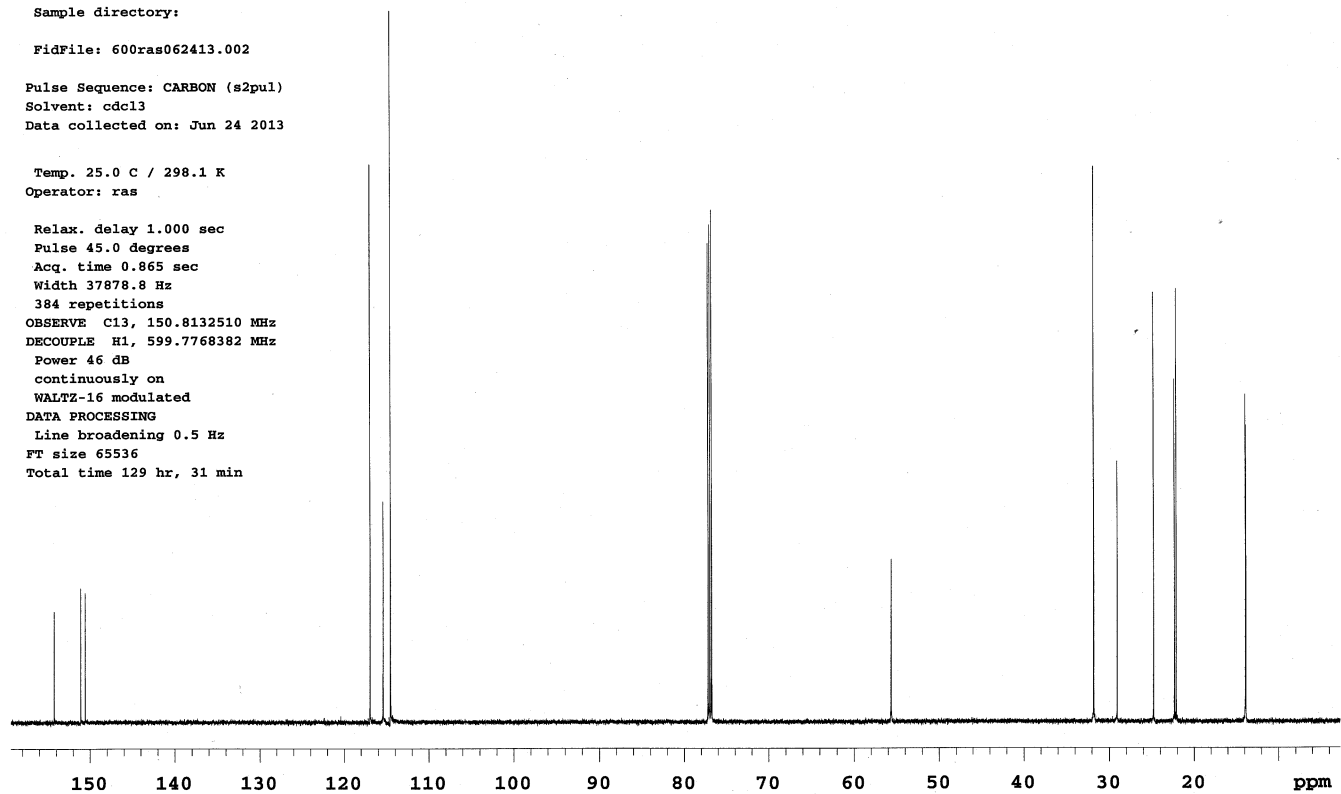

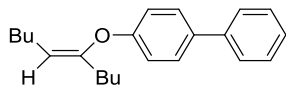

Sample Name:

Data Collected on:  
nmr600-vnmrs600  
Archive directory:

Sample directory:

FidFile: 600ras062413.004

Pulse Sequence: PROTON (s2pul)  
Solvent: cdcl3  
Data collected on: Jun 24 2013

Temp. 25.0 C / 298.1 K  
Operator: ras

Relax. delay 1.000 sec  
Pulse 45.0 degrees  
Acq. time 1.704 sec  
Width 9615.4 Hz  
Single scan  
OBSERVE H1, 599.7738381 MHz  
DATA PROCESSING  
FT size 32768  
Total time 0 min 3 sec

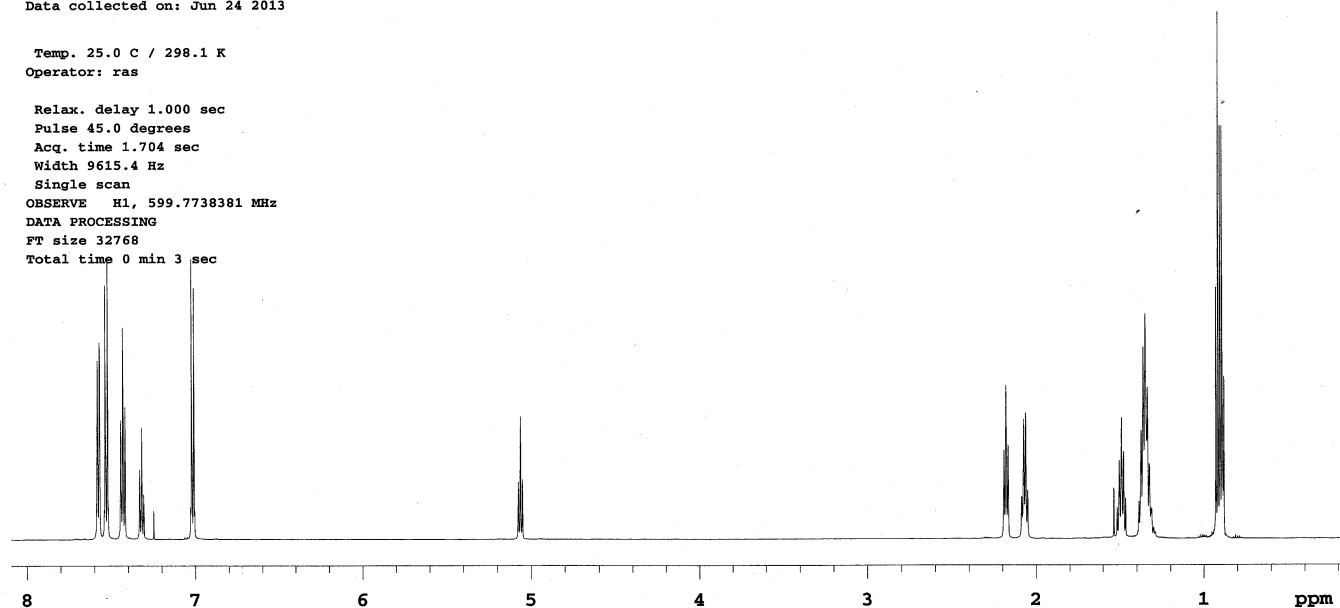



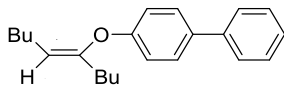

Sample Name:

Data Collected on:  
nmr600-vnmrs600  
Archive directory:

Sample directory:

FidFile: 600ras062413.005

Pulse Sequence: CARBON (s2pul)  
Solvent: cdcl3  
Data collected on: Jun 24 2013

Temp. 25.0 C / 298.1 K  
Operator: ras

Relax. delay 1.000 sec  
Pulse 45.0 degrees  
Acq. time 0.865 sec  
Width 37878.8 Hz  
112 repetitions  
OBSERVE C13, 150.8132523 MHz  
DECOUPLE H1, 599.7768382 MHz  
Power 46 dB  
continuously on  
WALTZ-16 modulated  
DATA PROCESSING  
Line broadening 0.5 Hz  
FT size 65536  
Total time 129 hr, 31 min

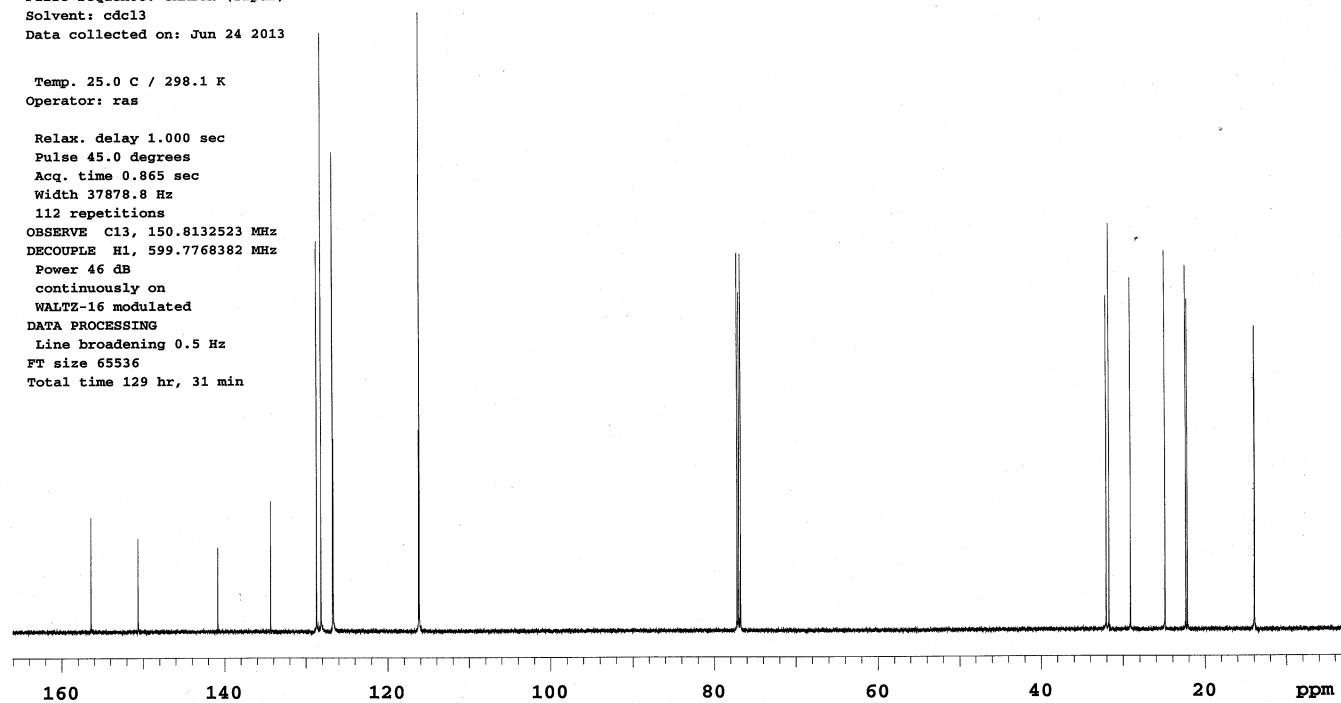

Supplement: Beilstein_J_Org_Chem-09-2002-s001.pdf [file Beilstein_J_Org_Chem-09-2002-s001.pdf]
